# Supplementary material
Source: ML conference proceedings conference paper supplement (https://openreview.net/forum?id=GfITbjrIOd)
Supplement: supplementary_material [file attachment]

## A Proofs

### A.1 Additional Lemmas

**Lemma 1** (Monotonicity). *If a utility function  $u$  satisfies Eq. [1](#) then  $u$  is monotone with respect to the probability that  $Y = 1$ , i.e., for any  $P, P' \in \mathcal{P}(\{0, 1\})$  such that  $P(Y = 1) \leq P'(Y = 1)$ , it holds that  $\mathbb{E}_{Y \sim P}[u(1, Y)] \leq \mathbb{E}_{Y \sim P'}[u(1, Y)]$ .*

*Proof.* We readily have that

$$\begin{aligned}\mathbb{E}_{Y \sim P}[u(1, Y)] &= P(Y = 1) \cdot u(1, 1) + (1 - P(Y = 1)) \cdot u(1, 0) \\ &\leq P'(Y = 1) \cdot u(1, 1) + (1 - P'(Y = 1)) \cdot u(1, 0) \\ &= \mathbb{E}_{Y \sim P'}[u(1, Y)],\end{aligned}$$

where, in the above inequality, we use that  $u(1, 1) > u(1, 0)$  and  $P(Y = 1) \leq P'(Y = 1)$ .  $\square$

**Lemma 2** (Trivial policies are not always optimal). *If a utility function  $u$  satisfies Eq. [1](#) then there exist  $P, P' \in \mathcal{P}(\{0, 1\})$  such that the trivial policies  $\pi$  that either always decide  $T = 1$  or always decide  $T = 0$  are suboptimal. In particular, for any  $P, P' \in \mathcal{P}(\{0, 1\})$  such that  $P(Y = 1) < c$  and  $P'(Y = 1) > c$ , where*

$$c = \frac{u(0, 0) - u(1, 0)}{u(1, 1) - u(1, 0) + u(0, 0) - u(0, 1)} \in (0, 1), \quad (8)$$

*it holds that*

$$\mathbb{E}_{Y \sim P}[u(1, Y)] < \mathbb{E}_{Y \sim P}[u(0, Y)] \quad \text{and} \quad \mathbb{E}_{Y \sim P'}[u(1, Y)] > \mathbb{E}_{Y \sim P'}[u(0, Y)]. \quad (9)$$

*Proof.* Let  $P$  be any distribution such that

$$P(Y = 1) < c = \frac{u(0, 0) - u(1, 0)}{u(1, 1) - u(1, 0) + u(0, 0) - u(0, 1)},$$

where  $c \in (0, 1)$  because, by assumption,  $u$  satisfies Eq. [1](#). Now, by rearranging the above inequality, we have that

$$P(Y = 1) \cdot u(1, 1) + (1 - P(Y = 1)) \cdot u(1, 0) < P(Y = 1) \cdot u(0, 1) + (1 - P(Y = 1)) \cdot u(0, 0),$$

and, using the definition of the expectation, it immediately follows that

$$\mathbb{E}_{Y \sim P}[u(1, Y)] < \mathbb{E}_{Y \sim P}[u(0, Y)].$$

The same argument can be used to show that, for any distribution  $P'$  such that  $P'(Y = 1) > c$ , it holds that  $\mathbb{E}_{Y \sim P'}[u(1, Y)] > \mathbb{E}_{Y \sim P'}[u(0, Y)]$ . Finally, note that, since  $c \in (0, 1)$ , we know that such distributions  $P$  and  $P'$  exist.  $\square$

### A.2 Proof of Theorem [3](#)

Before proving Theorem [3](#), we rewrite the expected utility with respect to the probability distribution  $P^{\mathcal{M}}$  in terms of confidence  $H$  and  $B$  by using the law of total expectation,

$$\mathbb{E}_{\pi}[u(T, Y)] = \mathbb{E}_{H, B \sim P^{\mathcal{M}}(H, B)} [\mathbb{E}_{\pi}[u(T, Y) | H, B]].$$

Here, to simplify notation, we will write

$$\mathbb{E}_{H, B} [\mathbb{E}_{\pi}[u(T, Y) | H, B]],$$

where note that, using the law of total expectation, we can write the inner expectation in the above expression in terms of the utilities of the trivial policies, i.e.,

$$\begin{aligned}\mathbb{E}_{\pi}[u(T, Y) | H, B] &= \mathbb{E}[u(1, Y) | H, B] \cdot P_{\pi}(T = 1 | H, B) \\ &\quad + \mathbb{E}[u(0, Y) | H, B] \cdot P_{\pi}(T = 0 | H, B),\end{aligned} \quad (10)$$

and we will use  $P$  to refer to probabilities induced by SCM  $\mathcal{M}$ , e.g.,  $P(H, B)$  to denote  $P^{\mathcal{M}}(H, B)$ .

Now, we restate and prove Theorem [3](#).

**Theorem [3](#).** There exist (infinitely many) AI-assisted decision making processes  $\mathcal{M}$  satisfying Eqs. [2](#) and [3](#), with utility functions  $u(T, Y)$  satisfying Eq. [1](#), such that  $f_B$  is perfectly calibrated and  $f_H$  is monotone but any AI-assisted decision policy  $\pi \in \Pi(H, B)$  that satisfies monotonicity is suboptimal, i.e.,  $\mathbb{E}_{\pi}[u(T, Y)] < \mathbb{E}_{\pi^*}[u(T, Y)]$ .

490 *Proof.* To prove the above claim, we construct a monotone confidence function  $f_H$ , perfectly  
 491 calibrated confidence function  $f_B$  and distribution  $P^{\mathcal{M}}$  for which any monotone AI-assisted decision  
 492 policy  $\pi \in \Pi(H, B)$  achieves strictly lower utility than a carefully constructed non monotone  
 493 AI-assisted decision policy  $\tilde{\pi} \in \Pi(H, B)$ .

494 We will present the proof in three parts. First, we will introduce the main building block and idea  
 495 behind the proof by a small construction of  $f_H, f_B$  and  $P^{\mathcal{M}}$  with  $|\mathcal{H}| = |\mathcal{B}| = 3$ , where  $\mathcal{B} \subseteq [0, 1]$   
 496 denotes the (discrete) output space of the classifier's confidence function. We then construct examples  
 497 of  $f_H, f_B$  and  $P^{\mathcal{M}}$  for arbitrary  $|\mathcal{H}| = k$  and  $|\mathcal{B}| = m$  with  $m, k \in \mathbb{N}, m > k \geq 2$ . Lastly, we  
 498 construct examples where  $\mathcal{B}$  is non-discrete and  $|\mathcal{H}| = k$  with  $k > 2$ .

#### 499 Main building block and small example.

500 We start by presenting the main idea of the proof using an example with a small set of confidence  
 501 values  $\mathcal{H}$  and  $\mathcal{B}$ . Let the values of the decision maker's confidence  $H$  be in  $\mathcal{H} = \{h_1, h_2, h_3\}$  and  
 502 the values of the classifier's confidence  $B$  be in  $\mathcal{B} = \{b_1, b_2, b_3\}$ , with order  $h_i < (h_i + 1)$  and  
 503  $b_i < (b_i + 1)$  respectively.

504 Our main building block, consists of two distributions  $P^-, P^+ \in \mathcal{P}(\{0, 1\})$  with  $P^-(Y = 1) < c$   
 505 and  $P^+(Y = 1) > c$ , where  $c$  depends on utility  $u$  as described by Eq. 8 in Lemma 2. We use  
 506 these distributions for our constructions of  $f_H, f_B$  and  $P^{\mathcal{M}}$ , so that for some realizations of  $H, B$   
 507 distribution  $P(Y = 1 \mid H, B)$  is either  $P^-$  or  $P^+$ . Using Lemma 2 and from Eq. 10, we have that:

(I) For any  $h_i, b_i$  such that  $P(Y \mid H = h_i, B = b_i) = P^-$ , it holds that

$$\mathbb{E}[u(1, Y) \mid H = h_i, B = b_i] < \mathbb{E}[u(0, Y) \mid H = h_i, B = b_i].$$

508 Hence, decreasing  $P_\pi(T = 1 \mid H, B)$  increases  $\mathbb{E}[u(T, Y) \mid H = h_i, B = b_i]$ .

(II) For any  $h_i, b_i$  such that  $P(Y \mid H = h_i, B = b_i) = P^+$ , it holds that

$$\mathbb{E}[u(1, Y) \mid H = h_i, B = b_i] > \mathbb{E}[u(0, Y) \mid H = h_i, B = b_i].$$

509 Hence, increasing  $P_\pi(T = 1 \mid H, B)$  increases  $\mathbb{E}[u(T, Y) \mid H = h_i, B = b_i]$ .

510 Intuitively, suppose we now have that, for confidence values  $h_2, b_2, Y \sim P^+$  and, for confidence  
 511 values  $h_3, b_2, Y \sim P^-$ , i.e.,  $P(Y \mid H = h_2, B = b_2) = P^+$  and  $P(Y \mid H = h_3, B = b_2) = P^-$ .  
 512 Then, any non-monotone AI-assisted decision policy  $\tilde{\pi}$  with  $P_{\tilde{\pi}}(T = 1 \mid H = h_2, B = b_2) >$   
 513  $P_{\tilde{\pi}}(T = 1 \mid H = h_3, B = b_2)$  will have higher expected utility than any monotone AI-assisted  
 514 decision policy given confidence values  $h_2, b_2$  and  $h_3, b_2$ . Finally, under an appropriate choice of  
 515 distribution  $P(H, B)$ , such non-monotone AI-assisted decision policies  $\tilde{\pi}$  will offer higher overall  
 516 utility in expectation.

517 We formalize this intuition with the following lemma:

518 **Lemma 3.** Let  $\mathcal{M}$  be any AI-assisted decision making process satisfying Eqs. 2 and 3 with utility  
 519 function  $u(T, Y)$  satisfying Eq. 1. If  $f_H, f_B$  and  $P^{\mathcal{M}}$  are such that there exists confidence values  
 520  $b \in \mathcal{B}, h_i, h_j \in \mathcal{H}$ , with  $h_i < h_j$ , which satisfy

$$\begin{aligned} P(H = h_i, B = b) > 0, \quad P(H = h_j, B = b) > 0, \\ P(Y \mid H = h_i, B = b) = P^+ \quad \text{and} \quad P(Y \mid H = h_j, B = b) = P^-, \end{aligned} \quad (11)$$

521 for some distributions  $P^-, P^+$  with  $P^-(Y = 1) < c$  and  $P^+(Y = 1) > c$ , where

$$c = \frac{u(0, 0) - u(1, 0)}{u(1, 1) - u(1, 0) + u(0, 0) - u(0, 1)}. \quad (12)$$

522 Then, for any monotone AI-assisted decision policy  $\pi \in \Pi(H, B)$ , there exists an AI-assisted  
 523 decision policy  $\tilde{\pi} \in \Pi(H, B)$  which is not monotone and achieves a strictly greater utility than  $\pi$ , i.e.,  
 524  $\mathbb{E}_\pi[u(T, Y)] < \mathbb{E}_{\tilde{\pi}}[u(T, Y)]$ .

525 *Proof.* Let  $\pi$  be a monotone AI-assisted decision policy, then it must hold that  $P_\pi(T = 1 \mid H =$   
 526  $h_i, B = b) \leq P_\pi(T = 1 \mid H = h_j, B = b)$  (see Eq. 4). Let  $\tilde{\pi}$  be an identical AI-assisted decision

527 policy to  $\pi$  up to the decision for confidence values  $h_i, b$  and  $h_j, b$ . We distinguish between three  
528 cases.

529 — **Case 1:**  $P_\pi(T = 1 \mid H = h_i, B = b) < P_\pi(T = 1 \mid H = h_j, B = b)$ .

530 Let the probability of  $T = 1$  under  $\tilde{\pi}$  for confidence values  $h_i, b$  and  $h_j, b$  be switched compared to  
531  $\pi$ , *i.e.*,

$$\begin{aligned} P_{\tilde{\pi}}(T = 1 \mid H = h_i, B = b) &= P_\pi(T = 1 \mid H = h_j, B = b), \\ P_{\tilde{\pi}}(T = 1 \mid H = h_j, B = b) &= P_\pi(T = 1 \mid H = h_i, B = b). \end{aligned}$$

532 Then,  $\tilde{\pi}$  is not monotone, as Eq. 4 is not satisfied, and it holds that

$$\begin{aligned} P_{\tilde{\pi}}(T = 1 \mid H = h_i, B = b) &> P_\pi(T = 1 \mid H = h_i, B = b), \\ P_{\tilde{\pi}}(T = 1 \mid H = h_j, B = b) &< P_\pi(T = 1 \mid H = h_j, B = b). \end{aligned}$$

533 As we decreased  $P(T = 1 \mid H = h_j, B = b)$  and increased  $P(T = 1 \mid H = h_i, B = b)$ , by  
534 properties (I) and (II) it must hold that the expected utility of  $\tilde{\pi}$  given confidence values  $h_i, b$  and  
535  $h_j, b$  is higher than the one of  $\pi$ , *i.e.*,

$$\mathbb{E}_{\tilde{\pi}}[u(T, Y) \mid H = h_i, B = b] > \mathbb{E}_{\pi}[u(T, Y) \mid H = h_i, B = b] \quad \text{and} \quad (13)$$

$$\mathbb{E}_{\tilde{\pi}}[u(T, Y) \mid H = h_j, B = b] > \mathbb{E}_{\pi}[u(T, Y) \mid H = h_j, B = b]. \quad (14)$$

536 — **Case 2:**  $0 < P_\pi(T = 1 \mid H = h_i, B = b) = P_\pi(T = 1 \mid H = h_j, B = b) \leq 1$ .

537 Let the probability of  $T = 1$  under  $\tilde{\pi}$  for confidence values  $h_j, b$  be strictly lower compared to  $\pi$  and  
538 be the same as  $\pi$  for  $h_i, b$ . Then,  $\tilde{\pi}$  is not monotone, since by case assumption

$$P_{\tilde{\pi}}(T = 1 \mid H = h_i, B = b) = P_\pi(T = 1 \mid H = h_j, B = b) > P_{\tilde{\pi}}(T = 1 \mid H = h_j, B = b)$$

539 and the inequality in Eq. 14 holds by property (I).

540 — **Case 3:**  $P_\pi(T = 1 \mid H = h_i, B = b) = P_\pi(T = 1 \mid H = h_j, B = b) = 0$ .

541 Let the probability of  $T = 1$  under  $\tilde{\pi}$  for confidence values  $h_i, b$  be strictly higher compared to  $\pi$  and  
542 be the same as  $\pi$  for  $h_j, b$ . Then,  $\tilde{\pi}$  is not monotone, since by case assumption

$$P_{\tilde{\pi}}(T = 1 \mid H = h_j, B = b) = P_\pi(T = 1 \mid H = h_i, B = b) < P_{\tilde{\pi}}(T = 1 \mid H = h_i, B = b)$$

543 and the inequality in Eq. 13 holds by property (II).

544 As in all three cases at least one of the strict inequalities in Eqs. 13 or 14 holds and  $\tilde{\pi}$  is equivalent to  
545  $\pi$  (*i.e.*, it has the same expected conditional utility) given any other pair of confidence values  $h' \in \mathcal{H}$ ,  
546  $b' \in \mathcal{B}$ , we have that

$$\mathbb{E}_{\tilde{\pi}}[u(T, Y)] = \mathbb{E}[\mathbb{E}_{\tilde{\pi}}[u(T, Y) \mid H, B]] > \mathbb{E}[\mathbb{E}_{\pi}[u(T, Y) \mid H, B]] = \mathbb{E}_{\pi}[u(T, Y)].$$

547

□

548 Before proceeding further, we would like to note that we may also state Lemma 3 using  $h \in \mathcal{H}$ ,  
549  $b_i, b_j \in \mathcal{B}$ , with  $b_i < b_j$ , the proof would follow analogously.

550 Now, we construct an AI-decision making process  $\mathcal{M}$ , with  $\mathcal{H} = \{h_1, h_2, h_3\}$  and  $\mathcal{B} = \{b_1, b_2, b_3\}$ ,  
551 such the decision maker's confidence  $f_H$  is monotone, the classifier's confidence  $f_B$  is perfectly  
552 calibrated, and the conditions of Lemma 3 are satisfied. First, let  $f_H, f_B$  and  $P^{\mathcal{M}}$  be such that

$$P(f_B(Z) = b_j) = \begin{cases} 3/6 & \text{if } j = 1 \\ 2/6 & \text{if } j = 2 \\ 1/6 & \text{if } j = 3 \\ 0 & \text{otherwise} \end{cases} \quad \text{and}$$

$$P(H = h_i \mid B = b_j) := P_{X,V}(H = h_i \mid f_B(Z) = b_j) = \begin{cases} \frac{1}{4-j} & \text{if } i \geq j \\ 0 & \text{otherwise.} \end{cases}$$

553 Then, it readily follows that  $P(H = h_i, B = b_j) = 1/6$  for  $i \geq j$  and  $P(H = h_i, B = b_j) = 0$   
554 otherwise. Moreover, for each pair of confidence values  $(h_i, b_j)$  with positive probability  $P(H =$   
555  $h_i, B = b_j)$ , we set

$$P(Y = 1 \mid H = h_i, B = b_j) = \begin{cases} P^+ & \text{if } i = j = 2 \text{ or } (i = 3 \text{ and } j \in \{1, 3\}) \\ P^- & \text{if } (j = 2 \text{ and } i = 3) \text{ or } (j = 1 \text{ and } i \in \{1, 2\}), \end{cases}$$

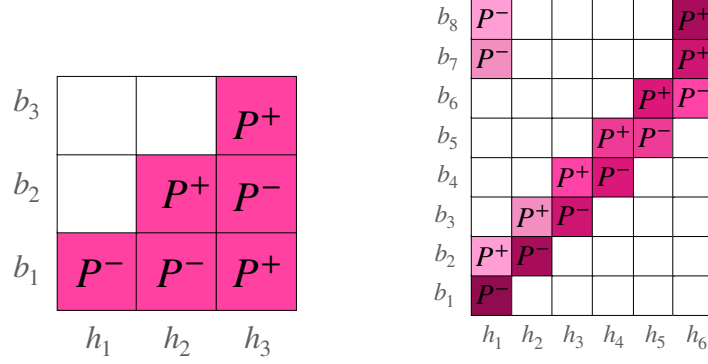

Figure 4: Nonzero values of  $P(Y = 1|H = h_i, B = b_j)$  and  $P(H = h_i, B = b_j)$  for every  $h_i \in \mathcal{H}$  and  $b_j \in \mathcal{B}$  used in the first (left) and second (right) part of the proof of Theorem 3. In each cell  $(h_i, b_j)$  in both panels,  $P^+$  or  $P^-$  is the value of  $P(Y = 1|H = h_i, B = b_j)$  and lighter color means lower value of  $P(H = h_i, B = b_j)$ , where white means  $P(Y = 1|h = h_i, B = b_j) = 0$  and  $P(H, B) = 0$ . In both panels, the assignment of values is very stylized to facilitate the proof—the classifier’s confidence function  $f_B$  partitions the feature space in a way such that a rational decision maker is unable to take decisions that maximize utility for almost all confidence values. However, less stylized examples also satisfy the conditions of Lemma 3. For example, as long as there is one triplet of confidence values  $b_2, h_2, h_3$  (or  $h_3, b_1, b_2$  in the left example) for which a rational decision maker is unable to take decisions that maximize utility, Lemma 3 can be applied.

as shown in Figure 4 (left). Then, it readily follows that  $f_H$  is monotone with respect to the probability that  $Y = 1$ , i.e.,  $P(Y = 1 | H = h_i) \leq P(Y = 1 | H = h_{i+1})$ , and we have that the classifier’s confidence values

$$b_j := \sum_{i:i \geq j} P(H = h_i | B = b_j) \cdot P(Y = 1 | H = h_i, B = b_j) \\ = \begin{cases} 2/3 \cdot P^- + 1/3 \cdot P^+ & \text{if } j = 1 \\ 1/2 \cdot P^- + 1/2 \cdot P^+ & \text{if } j = 2 \\ P^+ & \text{if } j = 3 \\ 0 & \text{otherwise} \end{cases}$$

are perfectly calibrated and satisfy that  $b_j < b_{j+1}$ .

Finally, using Lemma 3 with  $b = b_2$ ,  $h_i = h_2$ ,  $h_j = h_3$ , we have that any monotone AI-assisted decision policy is suboptimal for any  $\mathcal{M}$  with  $f_H$ ,  $f_B$  and  $P^{\mathcal{M}}$  as defined above.

**Construction with arbitrary  $|\mathcal{H}| = k$  and  $|\mathcal{B}| = m$ ,  $m > k \geq 2$ .**

In this second part of the proof, we construct an AI-assisted decision making processes  $\mathcal{M}$ , with  $|\mathcal{H}| = k$  and  $|\mathcal{B}| = m$  such that  $m > k \geq 2$ , such that the decision maker’s confidence  $f_H$  is monotone, the classifier’s confidence  $f_B$  is perfectly calibrated and the conditions of Lemma 3 are satisfied.

First, let the space of confidence values be  $\mathcal{H} = \{h_i\}_{i \in [k]}$  and  $\mathcal{B} = \{b_j\}_{j \in [m]}$ , with order  $h_i < h_{i+1}$  and  $b_i < b_{i+1}$ , respectively, and  $f_H$ ,  $f_B$  and  $P^{\mathcal{M}}$  be such that  $P(f_B(Z) = b_j) = 1/m$  and

$$P(H = h_i | B = b_j) := P_{X,V}(H = h_i | f_B(Z) = b_j) = \begin{cases} \frac{m-j+1}{m} & \text{if } j = i \\ \frac{m-j+1}{m} & \text{if } i = 1, j > k \\ \frac{j-1}{m} & \text{if } j = i + 1, j \leq k \\ \frac{j-1}{m} & \text{if } i = k, j > k \\ 0 & \text{otherwise.} \end{cases} \quad (15)$$

Moreover, for each pair of confidence values  $(h_i, b_j)$  with positive probability  $P(H = h_i, B = b_j)$ , we set

$$P(Y = 1 \mid H = h_i, B = b_j) = \begin{cases} P^- & \text{if } j = i \\ P^- & \text{if } i = 1, j > k \\ P^+ & \text{if } j = i + 1, j \leq k \\ P^+ & \text{if } i = k, j > k, \end{cases} \quad (16)$$

as shown in Figure 4 (right). Further, we set the classifier's confidence values  $b_j$  to

$$b_j := \frac{m - j + 1}{m} \cdot P^- + \frac{j - 1}{m} \cdot P^+.$$

Then, it holds that  $b_j < b_{j+1}$  and  $f_B$  is perfectly calibrated as

$$P(Y = 1 \mid B = b_j) = \begin{cases} P(H = h_j \mid B = b_j) \cdot P^- + P(H = h_{j-1} \mid B = b_j) \cdot P^+ & \text{if } j \leq k \\ P(H = h_1 \mid B = b_j) \cdot P^- + P(H = h_k \mid B = b_j) \cdot P^+ & \text{if } j > k \end{cases}$$

and thus, using the definitions of  $P(H \mid B)$  and  $P(Y \mid H, B)$ , we have that  $P(Y \mid B = b_j) = b_j$ .

To show that  $f_H$  is monotone with respect to the probability that  $Y = 1$ , first note that  $P(H = h_i, B = b_i)$  decreases as  $i$  increases and  $P(H = h_i, B = b_{i+1})$  increases as  $i$  increases. Moreover, further note that  $P(Y = 1 \mid H = h_i, B = b_i) = P^- < P(Y = 1 \mid H = h_i, B = b_{i+1}) = P^+$ . Hence, for any  $i \in \{2, \dots, k-1\}$ , it readily follows that

$$\begin{aligned} P(Y = 1 \mid H = h_i) &= P^+ \cdot P(B = b_{i+1} \mid H = h_i) + P^- \cdot P(B = b_i \mid H = h_i) \\ &\leq P(Y = 1 \mid H = h_{i+1}), \end{aligned}$$

and, for  $i = 1$ , it is evident that  $P(Y = 1 \mid H = h_1) < P(Y = 1 \mid H = h_2)$ .

Finally, using Lemma 3 with any choice of confidence values  $b = b_j$ ,  $h_i = h_{j-1}$  and  $h_j = h_j$  with  $j \in \{2, \dots, k\}$ , we have that any monotone AI-assisted decision policy  $\pi$  is suboptimal for any  $\mathcal{M}$  with  $|\mathcal{H}| = k$  and  $|\mathcal{B}| = m$ ,  $m > k \geq 2$ , and  $f_H, f_B$  and  $P^{\mathcal{M}}$  as defined above. Here, note that, as we do not fix the exact distributions  $P^-$  and  $P^+$ , the above Lemma applies to infinitely many AI-assisted decision making processes  $\mathcal{M}$ .

**Construction with  $\mathcal{B} \subseteq [0, 1]$  and  $|\mathcal{H}| = k$ .**

In this last part of the proof, we construct an AI-assisted decision making process  $\mathcal{M}$ , with  $|\mathcal{H}| = k \geq 2$  and  $\mathcal{B} \subseteq [0, 1]$ , such that the decision maker's confidence function  $f_H$  is monotone, the classifier's confidence function  $f_B$  is perfectly calibrated and the conditions of Lemma 3 are satisfied.

First, let the space of confidence values be  $\mathcal{H} = \{h_i\}_{i \in [k]}$ , with order  $h_i < h_{i+1}$ , the feature space<sup>10</sup>  $\mathcal{X} = [0, 1]$ , and  $f^-, f^+$  be two strictly monotone increasing functions with

$$f^- : [0, 1] \rightarrow [0, c] \quad \text{and} \quad f^+ : [0, 1] \rightarrow (c, 1], \quad (17)$$

where

$$c = \frac{u(0, 0) - u(1, 0)}{u(1, 1) - u(1, 0) + u(0, 0) - u(0, 1)}. \quad (18)$$

Further, let  $Q_{k+1} = \{q_0, q_1, \dots, q_k, q_{k+1}\}$  be a set of quantiles such that  $P(X \leq q_j) = j/(k+1)$  for all  $j \in \{0, 1, \dots, k+1\}$  and thus, we have that, for all  $j \in [k+1]$ ,

$$\text{for } I_j := (q_{j-1}, q_j], \quad \text{it holds that } P(X \in I_j) = \frac{1}{k+1}.$$

Now, let  $f_H$  and  $P^{\mathcal{M}}$  be such that

$$P_V(H = h_i \mid X, X \in I_j) = \begin{cases} 1/2 & \text{if } i \in \{j-1, j\} \\ 1 & \text{if } i = j = 1 \text{ or } (i = k \text{ and } j = k+1) \\ 0 & \text{otherwise,} \end{cases} \quad (19)$$

<sup>10</sup>For a more general feature space  $\mathcal{X}$ , we can use a mapping  $\phi$  of  $\mathcal{X}$  to  $[0, 1]$ . The proof works analogously by substituting  $X$  with  $\phi(X)$ .

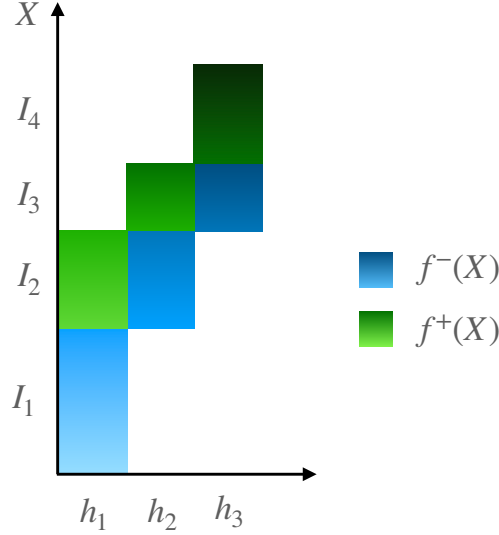

Figure 5: Nonzero values of  $P(Y = 1 | X, H = h_i, X \in I_j)$  for every  $h_i \in \mathcal{H}$ , with  $|\mathcal{H}| = 3$ , and  $I_j = (q_{j-1}, q_j]$ , with  $q_j \in Q_4$  used in the last part of the proof of Theorem 3. Lighter color means lower value of  $f^-$  or  $f^+$ .

594 and let

$$P(Y = 1 \mid X, H = h_i, X \in I_j) = \begin{cases} f^-(X) & \text{if } j = i \text{ or } (i = j = 1) \\ f^+(X) & \text{if } j = i + 1 \text{ or } (i = k \text{ and } j = k + 1), \end{cases} \quad (20)$$

595 as shown in Figure 5. Next, we define

$$f_B(Z) = f_B(X) := P(Y = 1 \mid X) = \begin{cases} f^-(X) & \text{if } X \in I_1 \\ f^+(X) & \text{if } X \in I_{k+1} \\ (f^-(X) + f^+(X))/2 & \text{otherwise,} \end{cases}$$

596 which, by construction, is perfectly calibrated.

597 To show that the decision maker's confidence function  $f_H$  is monotone with respect to the probability  
598 that  $Y = 1$ , we first note that, using Eq. 19, we have that

$$P(X \in I_j \mid H = h_i) = \begin{cases} 1/2 & \text{if } 1 < i < k \text{ and } j \in \{i, i + 1\} \text{ and} \\ 1 & \text{if } i = j = 1 \\ 1 & \text{if } i = k \text{ and } j = k + 1 \\ 0 & \text{otherwise.} \end{cases} \quad (21)$$

599 Hence, using Eq. 21 and the law of total probability, for any  $i \in \{2, \dots, k - 2\}$ , we have that

$$\begin{aligned} P(Y = 1 \mid H = h_i) &= \frac{1}{2} [P(Y = 1 \mid H = h_i, X \in I_i) + P(Y = 1 \mid H = h_i, X \in I_{i+1})] \\ &\leq \frac{1}{2} [f^-(q_i) + f^+(q_{i+1})] \\ &= \frac{1}{2} [f^-(\inf I_{i+1}) + f^+(\inf I_{i+2})] \\ &\leq \frac{1}{2} [P(Y = 1 \mid H = h_{i+1}, X \in I_{i+1}) + P(Y = 1 \mid H = h_{i+1}, X \in I_{i+2})] \\ &= P(Y = 1 \mid H = h_{i+1}), \end{aligned}$$

600 where the inequalities follow from the fact that  $f^-$  and  $f^+$  are strictly monotone increasing. Corner  
601 cases for  $i = 1$  and  $i = k - 1$  can be shown analogously by further using that  $f^-(X) < c < f^+(X)$   
602 for all  $X$ .

603 Finally, using Lemma 3 with any choice of confidence values  $h_i = h_{j-1}$   $h_j = h_j$ ,  $j \in \{2, \dots, k-1\}$   
 604 and  $b = f_B(X)$  with  $X \in I_j$ , we have that any monotone AI-assisted decision policy  $\pi$  is suboptimal  
 605 for any  $\mathcal{M}$  with  $|\mathcal{B}| \subseteq [0, 1]$  and  $|\mathcal{H}| = k$ ,  $k \geq 2$  and  $f_H$ ,  $f_B$  and  $P^\mathcal{M}$  as defined above.  $\square$

### 606 A.3 Proof of Theorem 5

607 We prove the statement by contraposition. Let  $\mathcal{M}$  be an AI-assisted decision making process  
 608 satisfying Eqs. 2 and 3, with a utility function  $u(T, Y)$  satisfying Eq. 1 and let  $\mathcal{M}$  be such that  $f_B$   
 609 satisfies  $\alpha$ -alignment with respect to  $f_H$  and  $f_B$  has output space  $\mathcal{B} \subseteq [0, 1]$ . Assume there exists no  
 610 (near-)optimal monotone AI-assisted decision policy for utility  $u$ . Thus, there must exist an optimal  
 611 AI-assisted decision policy  $\pi \in \Pi(H, B)$  which is not monotone and has strictly greater expected  
 612 utility than any monotone policy. However, we show that we can modify  $\pi$  to a monotone AI-assisted  
 613 decision policy  $\hat{\pi} \in \Pi(H, B)$  with near-optimal expected utility.

614 As  $\pi$  is not monotone, there must exist confidence values  $h_1, h_2 \in \mathcal{H}$ ,  $h_1 \leq h_2$ , and  $b_1, b_2 \in \mathcal{B}$ ,  
 615  $b_1 \leq b_2$ , such that

$$\pi(h_1, b_1, w) > \pi(h_2, b_2, w) \quad \text{for some } w \in \mathcal{W}, \quad (22)$$

616 where  $\mathcal{W}$  denotes the space of noise values. In what follows, let  $\tilde{\mathcal{W}}_{h_1, b_1}^{(\pi, h_2, b_2)} \subseteq \mathcal{W}$  denote the set  
 617 containing any such  $w$  and let  $\tilde{\mathcal{W}}^{(\pi, h_2, b_2)} = \bigcup_{h, b \in \mathcal{H} \times \mathcal{B}} \tilde{\mathcal{W}}_{h, b}^{(\pi, h_2, b_2)}$ .

618 For any confidence value  $h', b' \in \mathcal{H} \times [0, 1]$ , we modify policy  $\pi$  to a policy  $\hat{\pi}$  as follows. Let  
 619  $\{\tilde{\mathcal{S}}_h\}_{h \in \mathcal{H}}$  denote the sets satisfying the  $\alpha$ -alignment condition for  $f_B$  with respect to  $f_H$  and, given  
 620 confidence  $h'$ , let  $\hat{b}_{h'}$  denote the smallest confidence value of  $f_B$ , such that there exist  $h \leq h'$  with  
 621  $P(Y = 1 \mid B = \hat{b}_{h'}, Z \in \tilde{\mathcal{S}}_h) \geq c$ , i.e.,

$$\hat{b}_{h'} := \min\{b \in \mathcal{B} \mid P(Y = 1 \mid B = b, Z \in \tilde{\mathcal{S}}_h) \geq c \text{ for } h \leq h'\}. \quad (23)$$

622 Now, we define a new AI-assisted policy  $\hat{\pi}$  from  $\pi$  as follows,

$$\hat{\pi}(h', b', w) := \begin{cases} 1 & \text{if } b' \geq \hat{b}_h \text{ and } w \in \bigcup_{h \leq h', b \in [\hat{b}_{h'}, b']} \tilde{\mathcal{W}}^{(\pi, h, b)} \\ 0 & \text{if } b' < \hat{b}_h \text{ and } w \in \bigcup_{h \geq h', b \in [b', \hat{b}_{h'}]} \tilde{\mathcal{W}}^{(\pi, h, b)} \\ \pi(h', b', w) & \text{otherwise.} \end{cases} \quad (24)$$

623 Next, we show that  $\hat{\pi}$  is monotone and  $\mathbb{E}_{\hat{\pi}}[u(T, Y)] \geq \mathbb{E}_{\pi}[u(T, Y)] + \alpha \cdot a$  for some constant  $a$ .

624 **Proof  $\hat{\pi}$  is a monotone assisted policy.**

625 To prove that  $\hat{\pi} \in \Pi(H, B)$  is a monotone AI-assisted decision policy, we show that, for all  
 626  $h', h'' \in \mathcal{H}$ ,  $b', b'' \in \mathcal{B}$ , with  $h' \leq h''$ ,  $b' \leq b''$ , it holds that  $\tilde{\mathcal{W}}_{h', b'}^{(\hat{\pi}, h'', b'')} = \emptyset$ . We distinguish between  
 627 three cases.

628 — **Case 1:**  $b' \geq \hat{b}_{h'}$  and  $b'' \geq \hat{b}_{h''}$ .

629 Since  $h' \leq h''$ ,  $b' \leq b''$  and, by definition,  $\hat{b}_{h''} \leq \hat{b}_{h'}$  since  $h' \leq h''$ , we have that

$$\bigcup_{h \leq h', b \in [\hat{b}_{h'}, b']} \tilde{\mathcal{W}}^{(\pi, h, b)} \subseteq \bigcup_{h \leq h'', b \in [\hat{b}_{h''}, b'']} \tilde{\mathcal{W}}^{(\pi, h, b)}.$$

630 Hence, we can conclude that

$$\hat{\pi}(h', b', w) \leq 1 = \hat{\pi}(h'', b'', w) \text{ for all } w \in \bigcup_{h \leq h'', b \in [\hat{b}_{h''}, b'']} \tilde{\mathcal{W}}^{(\pi, h, b)}. \quad (25)$$

631 Further, for any other  $w \in \mathcal{W} - \bigcup_{h \leq h'', b \in [\hat{b}_{h''}, b'']} \tilde{\mathcal{W}}^{(\pi, h, b)} \subseteq \mathcal{W} - \tilde{\mathcal{W}}_{h', b'}^{(\pi, h'', b'')}$ , we have that  
 632  $\hat{\pi}(h', b', w) = \pi(h', b', w)$  and  $\hat{\pi}(h'', b'', w) = \pi(h'', b'', w)$  and, by definition of  $\tilde{\mathcal{W}}_{h', b'}^{(\pi, h'', b'')}$ , it  
 633 follows that

$$\hat{\pi}(h', b', w) \leq \hat{\pi}(h'', b'', w) \text{ for all } w \in \mathcal{W} - \bigcup_{h \leq h'', b \in [\hat{b}_{h''}, b'']} \tilde{\mathcal{W}}^{(\pi, h, b)}. \quad (26)$$

634 From Eqs. [25](#) and [26](#) it follows that  $\tilde{\mathcal{W}}_{h',b'}^{(\hat{\pi},h'',b'')} = \emptyset$ .

635 — **Case 2:**  $b' < \hat{b}_{h'}$  and  $b'' \geq \hat{b}_{h''}$ .

636 By definition of  $\hat{\pi}$ , we have that

$$\hat{\pi}(h', b', w) \leq 1 = \hat{\pi}(h'', b'', w) \text{ for all } w \in \bigcup_{h \leq h'', b \in [\hat{b}_{h''}, b'']} \tilde{\mathcal{W}}^{(\pi, h, b)} \quad (27)$$

637 and

$$\hat{\pi}(h', b', w) = 0 \leq \hat{\pi}(h'', b'', w) \text{ for all } w \in \bigcup_{h \geq h', b \in [b', \hat{b}_{h'}]} \tilde{\mathcal{W}}^{(\pi, h, b)} \quad (28)$$

638 Analogously to case 1, since the values of  $w$  below are also in  $\mathcal{W} - \tilde{\mathcal{W}}_{h',b'}^{(\pi, h'', b'')}$  and  $\hat{\pi}$  is equivalent  
639 to  $\pi$  for these values, we have that

$$\hat{\pi}(h', b', w) \leq \hat{\pi}(h'', b'', w) \text{ for all } w \in \mathcal{W} - \bigcup_{h \leq h'', b \in [\hat{b}_{h''}, b'']} \tilde{\mathcal{W}}^{(\pi, h, b)} - \bigcup_{h \geq h', b \in [b', \hat{b}_{h'}]} \tilde{\mathcal{W}}^{(\pi, h, b)} \quad (29)$$

640 From Eqs. [27](#) [28](#) and [29](#) it follows that  $\tilde{\mathcal{W}}_{h',b'}^{(\hat{\pi},h'',b'')} = \emptyset$ .

641 — **Case 3:**  $b' < \hat{b}_{h'}$  and  $b'' < \hat{b}_{h''}$ .

642 Since  $h' \leq h''$ ,  $b' \leq b''$  and, by definition,  $\hat{b}_{h''} \leq \hat{b}_{h'}$  since  $h' \leq h''$ , we have that

$$\bigcup_{h \geq h'', b \in [b'', \hat{b}_{h''}]} \tilde{\mathcal{W}}^{(\pi, h, b)} \subseteq \bigcup_{h \geq h', b \in [b', \hat{b}_{h'}]} \tilde{\mathcal{W}}^{(\pi, h, b)}.$$

643 Hence, we can conclude that

$$\hat{\pi}(h', b', w) = 0 \leq \hat{\pi}(h'', b'', w) \text{ for all } w \in \bigcup_{h \geq h', b \in [b', \hat{b}_{h'}]} \tilde{\mathcal{W}}^{(\pi, h, b)} \quad (30)$$

644 Again analogously to case 1, since the values of  $w$  below are also in  $\mathcal{W} - \tilde{\mathcal{W}}_{h',b'}^{(\pi, h'', b'')}$  and  $\hat{\pi}$  is  
645 equivalent to  $\pi$  for these values, we have that

$$\hat{\pi}(h', b', w) \leq \hat{\pi}(h'', b'', w) \text{ for all } w \in \mathcal{W} - \bigcup_{h \geq h', b \in [b', \hat{b}_{h'}]} \tilde{\mathcal{W}}^{(\pi, h, b)} \quad (31)$$

646 From Eqs. [30](#) and [31](#) it follows that  $\tilde{\mathcal{W}}_{h',b'}^{(\hat{\pi},h'',b'')} = \emptyset$ .

647 Note that, we cannot have a case where  $b' \geq \hat{b}_{h'}$  and  $b'' < \hat{b}_{h''}$ , as this would imply  $b'' < b'$ . Since,  
648 in all three possible cases, we have shown that  $\tilde{\mathcal{W}}_{h',b'}^{(\hat{\pi},h'',b'')} = \emptyset$ , we can conclude that  $\hat{\pi} \in \Pi(H, B)$   
649 is monotone.

650 **Proof  $\hat{\pi}$  is near optimal.**

651 First, we rewrite the inner expectation in Eq. [10](#) as

$$\begin{aligned} \mathbb{E}_{\pi}[u(T, Y) \mid H, B] &= \mathbb{E}[u(0, Y) \mid H, B] + (\mathbb{E}[u(1, Y) \mid H, B] \\ &\quad - \mathbb{E}[u(0, Y) \mid H, B]) \cdot P_{\pi}(T = 1 \mid H, B). \end{aligned}$$

652 Further, recall that  $|\tilde{\mathcal{S}}_h| \geq (1 - \alpha/2)|\mathcal{S}_h|$  for all  $h \in \mathcal{H}$  and, for all  $h', h'' \in \mathcal{H}$ ,  $h' \leq h''$  and all  
653  $b', b'' \in [0, 1]$ ,  $b' \leq b''$ , we have that

$$P(Y = 1 \mid f_B(Z) = b', Z \in \tilde{\mathcal{S}}_{h'}) - P(Y = 1 \mid f_B(Z) = b'', Z \in \tilde{\mathcal{S}}_{h''}) \leq \alpha \quad (32)$$

654 Now, for any  $h' \in \mathcal{H}$ ,  $b' \in \mathcal{B}$ , we show an upper bound on  $\mathbb{E}_{\pi}[u(T, Y) \mid H = h', B = b'] -$   
655  $\mathbb{E}_{\hat{\pi}}[u(T, Y) \mid H = h', B = b']$ . We distinguish between three cases.

656 — **Case 1:**  $b' \geq \hat{b}_{h'}$  and  $P(Y = 1 \mid H = h', B = b') \geq c$ .

657 Using Lemma 2, we have that

$$(\mathbb{E}[u(1, Y) \mid H = h', B = b'] - \mathbb{E}[u(0, Y) \mid H = h', B = b']) \geq 0 \quad (33)$$

658 Moreover, as  $b' \geq \hat{b}_{h'}$ , the distribution of positive decisions in  $\hat{\pi}$  may also increase for  $h', b'$   
659 compared to  $\pi$  (see Eq. 24), i.e.,

$$P_{\pi}(T = 1 \mid H = h', B = b') - P_{\hat{\pi}}(T = 1 \mid H = h', B = b') \leq 0$$

660 Hence, it follows that

$$\begin{aligned} & \mathbb{E}_{\pi}[u(T, Y) \mid H = h', B = b'] - \mathbb{E}_{\hat{\pi}}[u(T, Y) \mid H = h', B = b'] \\ &= (\mathbb{E}[u(1, Y) \mid H = h', B = b'] - \mathbb{E}[u(0, Y) \mid H = h', B = b']) \\ & \times (P_{\pi}(T = 1 \mid H = h', B = b') - P_{\hat{\pi}}(T = 1 \mid H = h', B = b')) \leq 0. \end{aligned} \quad (34)$$

661 — **Case 2:**  $b' \geq \hat{b}_{h'}$  and  $P(Y = 1 \mid H = h', B = b') < c$ .

662 Since  $b' \geq \hat{b}_{h'}$ , there exists  $h, b \in \mathcal{H} \times \mathcal{B}$ , with  $h \leq h', b \leq b'$ , such that  $P(Y = 1 \mid B = b, Z \in \tilde{\mathcal{S}}_h) \geq c$ . Moreover, using the definition of  $\alpha$ -alignment, we have that

$$P(Y = 1 \mid B = b, Z \in \tilde{\mathcal{S}}_h) \leq P(Y = 1 \mid B = b', Z \in \tilde{\mathcal{S}}_{h'}) + \alpha \quad (35)$$

664 Then, we can use this to lower bound the expected utility of  $T = 1$  given  $B = b'$  and  $Z \in \tilde{\mathcal{S}}_{h'}$  as  
665 follows:

$$\begin{aligned} & \mathbb{E}[u(1, Y) \mid B = b, Z \in \tilde{\mathcal{S}}_h] - \mathbb{E}[u(1, Y) \mid B = b', Z \in \tilde{\mathcal{S}}_{h'}] \\ &= u(1, 1) \cdot (P(Y = 1 \mid B = b, Z \in \tilde{\mathcal{S}}_h) - P(Y = 1 \mid B = b', Z \in \tilde{\mathcal{S}}_{h'})) \\ &+ u(1, 0) \cdot (P(Y = 1 \mid B = b', Z \in \tilde{\mathcal{S}}_{h'}) - P(Y = 1 \mid B = b, Z \in \tilde{\mathcal{S}}_h)) \\ &\leq (u(1, 1) - u(1, 0)) \cdot \alpha, \end{aligned} \quad (36)$$

666 where the last inequality due to Eq. 35 and the assumption that  $u(1, 1) - u(1, 0) > 0$ . Analogously,  
667 we can also upper bound the expected utility of  $T = 0$  given  $H = h', B = b'$  and  $Z \in \tilde{\mathcal{S}}_{h'}$  as follows:  
668

$$\begin{aligned} & \mathbb{E}[u(0, Y) \mid B = b, Z \in \tilde{\mathcal{S}}_h] - \mathbb{E}[u(0, Y) \mid B = b', Z \in \tilde{\mathcal{S}}_{h'}] \\ &= u(0, 1) \cdot (P(Y = 1 \mid B = b, Z \in \tilde{\mathcal{S}}_h) - P(Y = 1 \mid B = b', Z \in \tilde{\mathcal{S}}_{h'})) \\ &+ u(0, 0) \cdot (P(Y = 1 \mid B = b', Z \in \tilde{\mathcal{S}}_{h'}) - P(Y = 1 \mid B = b, Z \in \tilde{\mathcal{S}}_h)) \\ &\geq (u(0, 1) - u(0, 0)) \cdot \alpha, \end{aligned} \quad (37)$$

669 where the last inequality holds due to Eq. 35 and the assumption that  $u(0, 1) - u(0, 0) < 0$ .

670 Now, as  $P(Y = 1 \mid B = b, Z \in \tilde{\mathcal{S}}_h) \geq c$ , by Lemma 2, we have that

$$\mathbb{E}[u(1, Y) \mid B = b, Z \in \tilde{\mathcal{S}}_h] \geq \mathbb{E}[u(0, Y) \mid B = b, Z \in \tilde{\mathcal{S}}_h] \quad (38)$$

671 Combining Eqs. 36, 37 and 38, we obtain

$$\begin{aligned} & \mathbb{E}[u(1, Y) \mid B = b', Z \in \tilde{\mathcal{S}}_{h'}] + \alpha(u(1, 1) - u(1, 0)) \\ & \geq \mathbb{E}[u(0, Y) \mid B = b', Z \in \tilde{\mathcal{S}}_{h'}] + \alpha(u(0, 1) - u(0, 0)) \end{aligned} \quad (39)$$

672 In addition, note that we have following trivial bound for the expectation when  $H = h'$  but  $Z \notin \tilde{\mathcal{S}}_{h'}$

$$u(1, 0) \leq \mathbb{E}[u(1, Y) \mid H = h', B = b'] \leq u(1, 1), \quad (40)$$

$$u(0, 1) \leq \mathbb{E}[u(0, Y) \mid H = h', B = b'] \leq u(0, 0) \quad (41)$$

673 Moreover, since  $b' \geq \hat{b}_{h'}$ , the distribution of positive decisions in  $\hat{\pi}$  may also increase for  $h', b'$   
674 compared to  $\pi$ , i.e.,

$$P_{\pi}(T = 1 \mid H = h', B = b') - P_{\hat{\pi}}(T = 1 \mid H = h', B = b') \leq 0$$

675 Hence, we have that

$$\begin{aligned} & \mathbb{E}_{\pi}[u(T, Y) \mid H = h', B = b'] - \mathbb{E}_{\hat{\pi}}[u(T, Y) \mid H = h', B = b'] \\ & \leq (-1) \cdot (\mathbb{E}[u(1, Y) \mid H = h', B = b'] - \mathbb{E}[u(0, Y) \mid H = h', B = b']), \end{aligned} \quad (42)$$

676 where the inequality follows since  $\mathbb{E}[u(1, Y) \mid H = h', B = b'] - \mathbb{E}[u(0, Y) \mid H = h', B = b'] \leq 0$   
 677 by Lemma 2 as  $P(Y = 1 \mid H = h', B = b') < c$ .

678 Finally, combining Eqs. 39, 40, 41 and 42 and using the law of total expectation, we obtain

$$\begin{aligned} \mathbb{E}_\pi[u(T, Y) \mid H = h', B = b'] - \mathbb{E}_{\hat{\pi}}[u(T, Y) \mid H = h', B = b'] \\ \leq (1 - \beta_{(h', b')})(\mathbb{E}[u(0, Y) \mid B = b', Z \in \tilde{\mathcal{S}}_{h'}] - \mathbb{E}[u(1, Y) \mid B = b', Z \in \tilde{\mathcal{S}}_{h'}]) \\ + \beta_{(h', b')}(\mathbb{E}[u(0, Y) \mid H = h', B = b'] - \mathbb{E}[u(1, Y) \mid H = h', B = b']) \\ \leq (1 - \beta_{(h', b')})\alpha(u(1, 1) - u(1, 0) + u(0, 0) - u(0, 1)) + \beta_{(h', b')}(u(0, 0) - u(1, 0)), \end{aligned} \quad (43)$$

679 where  $\beta_{(h', b')}$  denotes the probability of  $Z \notin \tilde{\mathcal{S}}_{h'}$  given  $H = h', B = b'$ , i.e.,  $\beta_{(h', b')} = P(Z \notin \tilde{\mathcal{S}}_{h'} \mid H = h', B = b')$ .

681 — **Case 3:**  $b' < \hat{b}_{h'}$ .

682 For all  $h, b$ , with  $h \leq h', b \leq b'$ , we have that  $P(Y = 1 \mid B = b, Z \in \tilde{\mathcal{S}}_h) < c$ . In particular,  
 683  $P(Y = 1 \mid B = b', Z \in \tilde{\mathcal{S}}_{h'}) < c$ . Thus, by Lemma 2

$$\mathbb{E}[u(1, Y) \mid B = b', Z \in \tilde{\mathcal{S}}_{h'}] < \mathbb{E}[u(0, Y) \mid B = b', Z \in \tilde{\mathcal{S}}_{h'}] \quad (44)$$

684 In this case, since  $b' < \hat{b}_{h'}$ , the distribution of positive decisions in  $\hat{\pi}$  may decrease for  $h, b$  compared  
 685 to  $\pi$ , i.e.,

$$0 \leq P_\pi(T = 1 \mid H = h, B = b) - P_{\hat{\pi}}(T = 1 \mid H = h, B = b)$$

686 Combining Eqs. 44, 40 and 41 and using the law of total expectation, we obtain

$$\begin{aligned} \mathbb{E}_\pi[u(T, Y) \mid H = h', B = b'] - \mathbb{E}_{\hat{\pi}}[u(T, Y) \mid H = h', B = b'] \\ \leq (\mathbb{E}[u(1, Y) \mid H = h', B = b'] - \mathbb{E}[u(0, Y) \mid H = h', B = b']) \cdot 1 \\ = (1 - \beta_{(h', b')})(\mathbb{E}[u(1, Y) \mid B = b', Z \in \tilde{\mathcal{S}}_{h'}] - \mathbb{E}[u(0, Y) \mid B = b', Z \in \tilde{\mathcal{S}}_{h'}]) \\ + \beta_{(h', b')}(\mathbb{E}[u(1, Y) \mid H = h', B = b'] - \mathbb{E}_Y[u(0, Y) \mid H = h', B = b']) \\ \leq \beta_{(h', b')}(u(1, 1) - u(0, 1)), \end{aligned} \quad (45)$$

687 where again  $\beta_{(h', b')} = P(Z \notin \tilde{\mathcal{S}}_{h'} \mid H = h', B = b')$ .

688 Now, for a fixed  $h' \in \mathcal{H}$ , since  $|\tilde{\mathcal{S}}_{h'}| \geq (1 - \alpha/2)|\mathcal{S}_{h'}|$ , we know that  $0 \leq \sum_{b \in \mathcal{B}} \beta_{(h', b)} \leq \alpha/2$ .  
 689 Hence, combining Eqs. 34, 43 and 45 from the three cases above, we have that

$$\begin{aligned} \mathbb{E}_B[\mathbb{E}_\pi[u(T, Y) \mid H = h', B = b']] - \mathbb{E}_B[\mathbb{E}_{\hat{\pi}}[u(T, Y) \mid H = h', B = b']] \\ = \mathbb{E}_B[\mathbb{E}_\pi[u(T, Y) \mid H = h', B = b'] - \mathbb{E}_{\hat{\pi}}[u(T, Y) \mid H = h', B = b']] \\ \leq \max\{\alpha(u(1, 1) - u(1, 0) + u(0, 0) - u(0, 1)) + \frac{\alpha}{2} \cdot (u(0, 0) - u(1, 0)), \frac{\alpha}{2} \cdot (u(1, 1) - u(0, 1))\} \\ \leq \alpha \cdot (u(1, 1) - u(0, 1)) + \frac{3}{2} \cdot (u(0, 0) - u(1, 0)). \end{aligned}$$

690 Finally, since by assumption  $\pi$  is optimal, i.e.,  $\mathbb{E}_\pi[u(T, Y)] = \mathbb{E}_{\pi^*}[u(T, Y)] =$   
 691  $\max_{\pi' \in \Pi(H, B)} \mathbb{E}_{\pi'}[u(T, Y)]$ , we can conclude by the law of total expectation that

$$\begin{aligned} \mathbb{E}_{\pi^*}[u(T, Y)] &= \mathbb{E}_H \mathbb{E}_B[\mathbb{E}_{Y, T \mid \pi}[u(T, Y) \mid H, B]] \\ &\leq \mathbb{E}_{\hat{\pi}}[u(T, Y)] + \alpha \cdot (u(1, 1) - u(0, 1)) + \frac{3}{2} \cdot (u(0, 0) - u(1, 0)). \end{aligned}$$

692 This concludes the proof.

#### 693 A.4 Proof of Theorem 8

694 If  $f_B$  is  $\alpha/2$ -multicalibrated with respect to  $\{\mathcal{S}_h\}_{h \in \mathcal{H}}$ , then, by definition, for any  $h \in \mathcal{H}$ , there exists  
 695  $\tilde{\mathcal{S}}_h \subset \mathcal{S}_h$  with  $|\mathcal{S}| \geq (1 - \alpha/2)|\mathcal{S}_h|$  such that, for any  $b \in [0, 1]$ , it holds that

$$|P(Y = 1 \mid f_B(Z) = b, Z \in \tilde{\mathcal{S}}_h) - b| \leq \alpha/2.$$

696 This directly implies that, for any  $h', h'' \in \mathcal{H}$  and  $b', b'' \in [0, 1]$ , we have that

$$P(Y = 1 \mid f_B(Z) = b', Z \in \tilde{\mathcal{S}}_{h'}) - b' - P(Y = 1 \mid f_B(Z) = b'', Z \in \tilde{\mathcal{S}}_{h''}) - b'' \leq \alpha \quad (46)$$

697 and, using linearity of expectation, we further have that

$$P(Y = 1 \mid f_B(Z) = b', Z \in \tilde{\mathcal{S}}_{h'}) - P(Y = 1 \mid f_B(Z) = b'', Z \in \tilde{\mathcal{S}}_{h''}) \leq \alpha + b' - b'', \quad (47)$$

698 showing that, whenever  $b' \leq b''$ , the  $\alpha$ -alignment condition is met. This proves that  $f_B$  is  $\alpha$ -aligned  
699 with respect to  $f_H$ .

700 Finally, if  $f_B$  is  $\alpha/2$ -multicalibrated with respect to  $\{\mathcal{S}_h\}_{h \in \mathcal{H}}$ , then, it is  $\alpha/2$ -calibrated with respect  
701 to any of the sets  $\mathcal{S}_h$ . Since  $\mathcal{Z} = \cup_{h \in \mathcal{H}} \mathcal{S}_h$ , this implies that  $f_B$  is  $\alpha/2$ -calibrated with respect to  $\mathcal{Z}$ .  
702 This concludes the proof.

### 703 A.5 Proof of Proposition 1

704 Given a discretization parameter  $\lambda$ , Algorithm 1 works with a discretized notion of  $\alpha$ -multicalibration,  
705 namely  $(\alpha, \lambda)$ -multicalibration:

706 **Definition 10.** Let  $\mathcal{C} \subseteq 2^{\mathcal{Z}}$  be a collection of subsets of  $\mathcal{Z}$ . For any  $\alpha, \lambda > 0$ , confidence function  
707  $f_B : \mathcal{Z} \rightarrow [0, 1]$  is  $(\alpha, \lambda)$ -multicalibrated with respect to  $\mathcal{C}$  if, for all  $S \in \mathcal{C}$ ,  $b \in \Lambda[0, 1]$ , and all  
708  $\mathcal{S}_{h, \lambda(b)}(g)$  such that  $|\mathcal{S}_{h, \lambda(b)}| \geq \alpha \lambda |\mathcal{S}_h|$ , it holds that

$$|\mathbb{E}[f_B(X, H) - P(Y = 1 \mid X, H) \mid (X, H) \in \mathcal{S}_{h, \lambda(b)}]| \leq \alpha. \quad (48)$$

709 Here, we can analogously define a discretized notion of  $\alpha$ -alignment, namely  $(\alpha, \lambda)$ -alignment.

710 **Definition 11.** For  $\alpha, \lambda > 0$ , a confidence function  $f_B : \mathcal{Z} \rightarrow [0, 1]$  is  $(\alpha, \lambda)$ -aligned with respect to  
711  $f_H$  if, for all  $h', h'' \in \mathcal{H}$ ,  $h' \leq h''$ , and all  $b', b'' \in \Lambda[0, 1]$ ,  $b' \leq b''$ , with  $|\mathcal{S}_{h', \lambda(b')}| > \alpha/2 \cdot \lambda |\mathcal{S}_{h'}|$   
712 and  $|\mathcal{S}_{h'', \lambda(b'')}| > \alpha/2 \cdot \lambda |\mathcal{S}_{h''}|$ , we have

$$P(Y = 1 \mid (X, H) \in \mathcal{S}_{h', \lambda(b')}) - P(Y = 1 \mid (X, H) \in \mathcal{S}_{h'', \lambda(b'')}) \leq \alpha. \quad (49)$$

713 In what follows, we first show that  $(\alpha, \lambda)$ -multicalibration with respect to  $\{\mathcal{S}_h\}_{h \in \mathcal{H}}$  implies  $(2\alpha +$   
714  $\lambda, \lambda)$ -alignment with respect to  $f_H$ .

715 **Theorem 12.** For  $\alpha, \lambda > 0$ , if  $f_B$  is  $(\alpha, \lambda)$ -multicalibrated with respect to  $\{\mathcal{S}_h\}_{h \in \mathcal{H}}$ , then  $f_B$  is  
716  $(2\alpha + \lambda, \lambda)$ -aligned with respect to  $f_H$ .

717 *Proof.* If  $f_B$  is  $(\alpha, \lambda)$ -multicalibrated with respect to  $\{\mathcal{S}_h\}_{h \in \mathcal{H}}$ , then, by definition, for all  $h \in \mathcal{H}$ ,  
718  $b \in \Lambda[0, 1]$ , and all  $\mathcal{S}_{h, \lambda(b)}$  such that  $|\mathcal{S}_{h, \lambda(b)}| \geq \alpha \cdot \lambda |\mathcal{S}_h|$ , it holds that

$$|\mathbb{E}[f_B(X, H) - P(Y = 1 \mid X, H) \mid (X, H) \in \mathcal{S}_{h, \lambda(b)}]| \leq \alpha. \quad (50)$$

719 This directly implies that, for all  $h', h'' \in \mathcal{H}$ ,  $b', b'' \in \Lambda[0, 1]$  with  $|\mathcal{S}_{h', \lambda(b')}| \geq \alpha \cdot \lambda |\mathcal{S}_{h'}|$  and  
720  $|\mathcal{S}_{h'', \lambda(b'')}| \geq \alpha \cdot \lambda |\mathcal{S}_{h''}|$ , it holds that

$$\begin{aligned} & \mathbb{E}[f_B(X, H) - P(Y = 1 \mid X, H) \mid (X, H) \in \mathcal{S}_{h'', \lambda(b'')}] \\ & - \mathbb{E}[f_B(X, H) - P(Y = 1 \mid X, H) \mid (X, H) \in \mathcal{S}_{h', \lambda(b')}] \leq 2\alpha \end{aligned} \quad (51)$$

721 and, using the linearity of expectation, we have that

$$\begin{aligned} & P(Y = 1 \mid (X, H) \in \mathcal{S}_{h', \lambda(b')}) - P(Y = 1 \mid (X, H) \in \mathcal{S}_{h'', \lambda(b'')}) \\ & \leq 2\alpha + \mathbb{E}[f_B(X, H) \mid (X, H) \in \mathcal{S}_{h', \lambda(b')}] - \mathbb{E}[f_B(X, H) \mid (X, H) \in \mathcal{S}_{h'', \lambda(b'')}] \end{aligned} \quad (52)$$

722 Whenever  $b' \leq b''$ , due to the  $\lambda$ -discretization, we have that

$$\mathbb{E}[f_B(X, H) \mid (X, H) \in \mathcal{S}_{h', \lambda(b')}] - \mathbb{E}[f_B(X, H) \mid (X, H) \in \mathcal{S}_{h'', \lambda(b'')}] \leq \lambda \quad (53)$$

723 Hence, we have shown that if  $f_B$  is  $\alpha$ -multicalibrated, then for all  $h', h'' \in \mathcal{H}$ ,  $b', b'' \in \Lambda[0, 1]$  with  
724  $|\mathcal{S}_{h', \lambda(b')}| \geq \alpha \cdot \lambda |\mathcal{S}_{h'}|$  and  $|\mathcal{S}_{h'', \lambda(b'')}| \geq \alpha \cdot \lambda |\mathcal{S}_{h''}|$ , we have

$$P(Y = 1 \mid (X, H) \in \mathcal{S}_{h', \lambda(b')}) - P(Y = 1 \mid (X, H) \in \mathcal{S}_{h'', \lambda(b'')}) \leq 2\alpha + \lambda. \quad (54)$$

725 Further, note that  $(2\alpha + \lambda)/2 \cdot \lambda > \alpha \cdot \lambda$  as  $\lambda > 0$ . This concludes the proof.  $\square$

Next, we show that, if  $f_B$  is  $(\alpha, \lambda)$ -aligned, then  $f_{B,\lambda}$  is  $\alpha$ -aligned with respect to  $f_H$ .

**Theorem 13.** For  $\alpha, \lambda > 0$ , if  $f_B$  is  $(\alpha, \lambda)$ -aligned with respect to  $f_H$ , then  $f_{B,\lambda}$  is  $\alpha$ -aligned with respect to  $f_H$ .

*Proof.* The proof is similar to the proof of Lemma 1 in Hébert-Johnson et al. [11]. Consider all  $\mathcal{S}_{h,\lambda(b)}$  such that  $|\mathcal{S}_{h,\lambda(b)}| < \alpha\lambda|\mathcal{S}_h|$ . By the  $\lambda$ -discretization, there are at most  $1/\lambda$  such sets, thus, the cardinality of their union is at most  $1/\lambda\alpha\lambda|\mathcal{S}_h| = \alpha|\mathcal{S}_h|$ . Hence, for all  $h \in \mathcal{H}$ , there exists a subset  $\tilde{\mathcal{S}}_h \subset \mathcal{S}_h$  with  $|\tilde{\mathcal{S}}_h| \geq (1 - \alpha)|\mathcal{S}_h|$  such that, for all  $h', h'' \in \mathcal{H}$ , with  $h' \leq h''$ , and all  $b', b'' \in \Lambda[0, 1]$ , with  $b' \leq b''$ , it holds that

$$P(Y = 1 \mid (X, H) \in \mathcal{S}_{h',\lambda(b')} \cap \tilde{\mathcal{S}}_{h'}) - P(Y = 1 \mid (X, H) \in \mathcal{S}_{h'',\lambda(b'')} \cap \tilde{\mathcal{S}}_{h''}) \leq \alpha. \quad (55)$$

The  $\lambda$ -discretization sets all values of  $(x, h) \in \mathcal{S}_{h',\lambda(b')}$  to  $f_{B,\lambda}(x, h) = \mathbb{E}[f_B(X, H) \mid f_B(X, H) \in \lambda(b')]$ . Note that, for  $(x, h) \in \mathcal{S}_{h',\lambda(b')}$ ,  $f_{B,\lambda}(x, h) \in \lambda(b')$  and for  $(x, h) \in \mathcal{S}_{h'',\lambda(b'')}$ ,  $f_{B,\lambda}(x, h) \in \lambda(b'')$ , so it still holds that  $\mathbb{E}[f_B(X, H) \mid f_B(X, H) \in \lambda(b')] \leq \mathbb{E}[f_B(X, H) \mid f_B(X, H) \in \lambda(b'')]$ . Thus, using Eq. 55 we have that

$$\begin{aligned} &P(Y = 1 \mid f_B(X, H) = \mathbb{E}[f_B(X, H) \mid (X, H) \in \lambda(b')], (X, H) \in \tilde{\mathcal{S}}_{h'}) \\ &\quad - P(Y = 1 \mid f_B(X, H) = \mathbb{E}[f_B(X, H) \mid (X, H) \in \lambda(b'')], (X, H) \in \tilde{\mathcal{S}}_{h''}) \leq \alpha \end{aligned} \quad (56)$$

This concludes the proof.  $\square$

Finally, using Theorems 12 and 13, it readily follows that, given a parameter  $\alpha'$ , the discretized confidence function  $f_{B,\lambda}$  returned by Algorithm 1 satisfies  $(2\alpha' + \lambda)$ -aligned calibration with respect to  $f_H$ .

## A.6 Proof Theorem 9

We structure the proof in three parts. We first explain the calibration guarantee that UMD provides and how it relates to human-aligned calibration. Then, we derive a lower bound on the size of the subsets  $\mathcal{D} \cap \mathcal{S}_h$  so that the discretized confidence function  $f_{B,\lambda}$  satisfies  $\alpha$ -aligned calibration with respect to  $f_H$  with high probability. Finally, building on this result, we derive an upper bound on  $|\mathcal{D}|$  so that  $f_{B,\lambda}$  satisfies  $\alpha$ -aligned calibration with high probability as long as there exists  $\gamma > 0$  so that  $P((X, H) \in \mathcal{S}_h) \geq \gamma$  for all  $h \in \mathcal{H}$ .

**Conditional Calibration implies Human-Aligned Calibration.** Running UMD on a dataset  $\mathcal{D} \in (\mathcal{Z} \times \mathcal{Y})^n$ , where each datapoint is sampled from  $P^{\mathcal{M}}$ , guarantees  $(\alpha, \xi)$ -conditional calibration, a PAC-style calibration guarantee [12]. Given a dataset  $\mathcal{D}$ , a confidence function  $f_B$  satisfies  $(\alpha, \xi)$ -conditional calibration if, with probability at least  $1 - \xi$  over the randomness in  $\mathcal{D}$ ,

$$\forall b \in [0, 1], \quad |P(Y = 1 | f_B(X, H) = b) - b| \leq \alpha.$$

This stands in contrast to the definition of  $\alpha$ -calibration, which requires only that the confidence  $f_B(X, H)$  is at most  $\alpha$  away from the true probability for  $1 - \alpha$  fraction of  $\mathcal{Z}$ .

Similarly, using an union bound over all  $h \in \mathcal{H}$ ,  $(\alpha/2, \xi/|\mathcal{H}|)$ -conditional calibration of  $f_B$  on each  $\mathcal{S}_h$ ,  $h \in \mathcal{H}$ , implies that, with probability at least  $1 - \xi$  over the randomness in  $\mathcal{D}$ ,  $f_B$  satisfies that

$$\forall h \in \mathcal{H}, \quad \forall b \in [0, 1], \quad |P(Y = 1 | f_B(X, H) = b, H = h) - b| \leq \alpha/2. \quad (57)$$

Hence, analogously to the proof of Theorem 8, this implies that, with probability at least  $1 - \xi$  over the randomness in  $\mathcal{D}$ ,  $f_B$  also satisfies that

$$\begin{aligned} &\forall h, h' \in \mathcal{H}, h \leq h', \quad \forall b, b' \in \mathcal{G}, b \leq b', \\ &P(Y = 1 | f_B(X, H) = b, H = h) - P(Y = 1 | f_B(X, H) = b', H = h') \leq \alpha. \end{aligned} \quad (58)$$

In summary, from Eqs. 57 and 58, we can conclude that  $(\alpha/2, \xi/|\mathcal{H}|)$ -conditional calibration of  $f_B$  on each  $\mathcal{S}_h$ ,  $h \in \mathcal{H}$ , implies that, with probability at least  $1 - \xi$ ,  $f_B$  satisfies  $\alpha$ -aligned calibration, where, for all  $h \in \mathcal{H}$ , we have that  $\tilde{\mathcal{S}}_h = \mathcal{S}_h$ .

**Lower bound on  $|\mathcal{D} \cap \mathcal{S}_h|$  to achieve conditional calibration with UMD.** Running UMD on each partition  $\mathcal{D} \cap \mathcal{S}_h$  of  $\mathcal{D}$  induced by  $h \in \mathcal{H}$  achieves  $(\alpha/2, \xi/|\mathcal{H}|)$ -conditional calibration as long as each subset  $\mathcal{D} \cap \mathcal{S}_h$  of the data is large enough. More specifically, the following lower bound on the size of the subsets  $\mathcal{D} \cap \mathcal{S}_h$  readily follows from Theorem 3 in Gupta et al. [12].

766 **Lemma 4.** *The discretized confidence function  $f_{B,\lambda}$  returned by  $|\mathcal{H}|$  instances of UMD, one per  $\mathcal{S}_h$ ,  
767 is  $(\alpha/2, \xi/|\mathcal{H}|)$ -conditional calibrated on  $\mathcal{S}_h$  for any  $\xi \in (0, 1)$  if*

$$|\mathcal{D} \cap \mathcal{S}_h| \geq n_{\min} := \left( \frac{2 \log \left( \frac{2|\mathcal{H}|}{\xi} \cdot \left\lceil \frac{1}{\lambda} \right\rceil \right)}{\alpha^2} + 2 \right) \cdot \left\lceil \frac{1}{\lambda} \right\rceil \quad (59)$$

768 *Proof.* Let  $B$  denote the number of bins in UMD. Theorem 3 in Gupta et al. [12] states that, if  
769  $f_B(X, H)$  is absolutely continuous with respect to the Lebesgue measure<sup>11</sup> and  $|\mathcal{D} \cap \mathcal{S}_h| \geq 2B$ ,  
770 then the discretized confidence function output by UMD is  $(\epsilon, \xi')$ -conditionally calibrated for any  
771  $\xi' \in (0, 1)$  and

$$\epsilon = \sqrt{\frac{\log(2B/\xi')}{2(|\mathcal{D} \cap \mathcal{S}_h|/B - 1)}}. \quad (60)$$

772 Then, for a given  $\alpha$ , setting  $\epsilon = \alpha/2$ ,  $B = \lceil 1/\lambda \rceil$  and  $\xi' = \xi/|\mathcal{H}|$ , we can solve Eq. 60 for the lower  
773 bound on  $|\mathcal{D} \cap \mathcal{S}_h| \geq n_{\min}$  with  $n_{\min}$  as defined in Eq. 59  $\square$

774 **Upper bound on  $|\mathcal{D}|$  to achieve conditional calibration with UMD.** Suppose  $P((X, H) \in \mathcal{S}_h) \geq \gamma$   
775 for all  $h \in \mathcal{H}$ . When  $|\mathcal{H}| \geq 2$ , we give an upper bound on  $|\mathcal{D}|$  so that with high probability  
776  $|\mathcal{D} \cap \mathcal{S}_h| \geq n_{\min}$  for all  $h \in \mathcal{H}$ .

777 In the process of sampling  $\mathcal{D} \in (\mathcal{Z} \times \mathcal{Y})^n$  from  $P^{\mathcal{M}}$ , let  $R_i^{(h)} = 1$  denote the event that the  $i$ -th  
778 datapoint  $(x_i, h_i, y_i)$  has confidence value  $h$ , i.e.,  $h_i = h$ . Then, we can express  $|\mathcal{D} \cap \mathcal{S}_h|$  in terms of  
779 random variable  $R^{(h)}$ , defined as

$$R^{(h)} = \sum_{i=1}^{|\mathcal{D}|} R_i^{(h)}. \quad (61)$$

780 Since  $R_i^{(h)}$  is a Bernoulli-distributed variable with  $P(R_i^{(h)}) = P((X, H) \in \mathcal{S}_h)$ , the expected value  
781 of  $R^{(h)}$  is  $\mu(h) := \mathbb{E}[R^{(h)}] = P((X, H) \in \mathcal{S}_h) \cdot |\mathcal{D}| \geq \gamma \cdot |\mathcal{D}|$ .

782 Let  $|\mathcal{D}| = 2 \cdot |\mathcal{H}| \cdot \log(2/\xi) \cdot 1/\gamma \cdot n_{\min}$ , observe that in this case

$$P(R^{(h)} \leq n_{\min}) = P\left(R^{(h)} \leq \frac{\gamma}{2|\mathcal{H}| \cdot \log(2/\xi)} \cdot |\mathcal{D}|\right).$$

783 For  $|\mathcal{H}| \geq 2$  and  $\xi \in (0, 1)$ , we have  $1/(2|\mathcal{H}| \cdot \log(2/\xi)) \in (0, 1)$  and we can use a variation of the  
784 Chernoff bound to show

$$\begin{aligned} P(R^{(h)} \leq n_{\min}) &\leq P\left(R^{(h)} \leq \frac{1}{2|\mathcal{H}| \cdot \log(2/\xi)} \cdot \mu(h)\right) \\ &\leq e^{-\mu(h) \left( \frac{2|\mathcal{H}| \cdot \log(2/\xi) - 1}{2|\mathcal{H}| \cdot \log(2/\xi)} \right)^2 \cdot \frac{1}{2}} \\ &= e^{-\mu(h) \cdot \frac{1}{2} \cdot \left( 1 - \frac{1}{|\mathcal{H}| \cdot \log(2/\xi)} + \frac{1}{(2|\mathcal{H}| \cdot \log(2/\xi))^2} \right)} \\ &\leq \frac{\xi}{2} \cdot e^{-|\mathcal{H}| \cdot n_{\min} \cdot \left( \frac{1}{2} - \frac{1}{2|\mathcal{H}| \cdot \log(2/\xi)} + \frac{1}{2(2|\mathcal{H}| \cdot \log(2/\xi))^2} \right)}, \end{aligned}$$

785 where the first and last inequality results from using  $\mu(h) > \gamma \cdot |\mathcal{D}|$ . We can now use a union bound  
786 to obtain a lower bound on the probability that for any  $h \in \mathcal{H}$ ,  $|\mathcal{D} \cap \mathcal{S}_h| \leq n_{\min}$ , i.e.,

$$P(\exists h \in \mathcal{H} : |\mathcal{D} \cap \mathcal{S}_h| \leq n_{\min}) \leq \frac{\xi}{2} \cdot |\mathcal{H}| \cdot e^{-|\mathcal{H}| \cdot n_{\min} \cdot \left( \frac{1}{2} - \frac{1}{2|\mathcal{H}| \cdot \log(2/\xi)} + \frac{1}{2(2|\mathcal{H}| \cdot \log(2/\xi))^2} \right)} \quad (62)$$

787 One can verify that for  $|\mathcal{H}| \geq 2$  and  $n_{\min} \geq 1$ , we have  $P(\exists h \in \mathcal{H} : |\mathcal{D} \cap \mathcal{S}_h| \leq n_{\min}) \leq \frac{\xi}{2}$ . Hence,  
788 if  $|\mathcal{D}| = 2 \cdot |\mathcal{H}| \cdot \log(2/\xi) \cdot 1/\gamma \cdot n_{\min}$ , then, for all  $h \in \mathcal{H}$ ,  $|\mathcal{D} \cap \mathcal{S}_h| \leq n_{\min}$  with probability  $1 - \xi/2$ .

<sup>11</sup>If  $f_B$  is not continuous with respect to the Lebesgue measure (or equivalently put,  $f_B$  does not have a probability density function), a randomization trick can be used to ensure that the results of the theorem hold.

789 Combining this result and Lemma 4, we have that the discretized confidence function  $f_{B,\lambda}$  returned  
 790 by  $|\mathcal{H}|$  instances of UMD, one per  $\mathcal{S}_h$ , is  $(\alpha/2, \xi/(2|\mathcal{H}|))$ -conditional calibrated on each  $\mathcal{S}_h$  with  
 791 probability at least  $1 - \xi/2$  for any  $\xi \in (0, 1)$  if

$$|\mathcal{D}| = 2 \cdot |\mathcal{H}| \cdot \frac{\log(2/\xi)}{\gamma} \cdot \left( \frac{2 \log \left( \frac{4|\mathcal{H}|}{\xi} \cdot \left\lceil \frac{1}{\lambda} \right\rceil \right)}{\alpha^2} + 2 \right) \cdot \left\lceil \frac{1}{\lambda} \right\rceil \quad (63)$$

Finally, using a union bound, we can conclude that  $f_{B,\lambda}$  achieves  $\alpha$ -aligned calibration with respect to  $f_H$  with probability at least  $1 - \xi$  from

$$|\mathcal{D}| = O \left( |\mathcal{H}| \cdot \frac{\log(|\mathcal{H}|/\xi\lambda)}{\alpha^2 \cdot \lambda \cdot \gamma} \right)$$

792 samples. This concludes the proof.

## B Multicalibration Algorithm

In this section, we give a high-level description of the post-processing algorithm for multicalibration introduced by Hébert-Johnson et al. [11]. The algorithm works with a discretization of  $[0, 1]$  into uniform sized bins of size  $\lambda$ , for a  $\lambda > 0$ . Formally the  $\lambda$ -discretization of  $[0, 1]$ , is defined as

**Definition 14** ( $\lambda$ -discretization [11]). *Let  $\lambda > 0$ . The  $\lambda$ -discretization of  $[0, 1]$ , denoted by  $\Lambda[0, 1] = \{\frac{\lambda}{2}, \frac{3\lambda}{2}, \dots, 1 - \frac{\lambda}{2}\}$ , is the set of  $1/\lambda$  evenly spaced real values over  $[0, 1]$ . For  $b \in \Lambda[0, 1]$ , let*

$$\lambda(b) = [b - \lambda/2, b + \lambda/2) \quad (64)$$

*be the  $\lambda$ -interval centered around  $b$  (except for the final interval, which will be  $[1 - \lambda, 1]$ ).*

It starts by partitioning each subspace  $\mathcal{S}_h$  into  $1/\lambda$  groups  $\mathcal{S}_{h,\lambda(b)} = \{(x, h) \in \mathcal{S}_h \mid f_B(x, h) \in \lambda(b)\}$ , with  $b \in \Lambda[0, 1]$ . Then, it repeatedly looks for a large enough group  $\mathcal{S}_{h,\lambda(b)}$  such that the absolute difference between the average confidence value  $\mathbb{E}[f_B(X, H) \mid (X, H) \in \mathcal{S}_{h,\lambda(b)}]$  and the probability  $P(Y = 1 \mid (X, H) \in \mathcal{S}_{h,\lambda(b)})$  is larger than  $\alpha$  and, if it finds it, it updates the confidence value  $f_B(x, h)$  of each  $(x, h) \in \mathcal{S}_{h,\lambda(b)}$  by this difference. Once the algorithm cannot find any more such a group, it returns a discretized confidence function  $f_{B,\lambda}(x, h) = \mathbb{E}[f_B(X, H) \mid f_B(X, H) \in \lambda(b)]$ , with  $b \in \Lambda[0, 1]$  such that  $f_B(x, h) \in \lambda(b)$ , which is guaranteed to satisfy  $(\alpha + \lambda)$ -multicalibration.

Algorithm 1 provides a pseudocode implementation of the overall algorithm. Within the implementation, it is worth noting that the expectations and probabilities can be estimated with fresh samples from the distribution or from a fixed dataset using tools from differential privacy and adaptive data analysis, as discussed in Hébert-Johnson et al. [11].

---

### Algorithm 1 Post-processing algorithm for $(\alpha + \lambda)$ -multicalibration

---

```

1: Input: confidence function  $f_B$ , parameters  $\alpha, \lambda > 0$ 
2: Output: confidence function  $f_{B,\lambda}$ 
3: repeat
4:   updated  $\leftarrow$  false
5:   for  $\mathcal{S}_h \in \mathcal{C}$  &  $b \in \Lambda[0, 1]$  do
6:      $\mathcal{S}_{h,\lambda(b)} \leftarrow \mathcal{S}_h \cap \{(x, h) \in \mathcal{Z} \mid f_B(x, h) \in \lambda(b)\}$ 
7:     if  $P((X, H) \in \mathcal{S}_{h,\lambda(b)}) < \alpha\lambda \cdot P((X, H) \in \mathcal{S}_h)$  then
8:       continue
9:      $\bar{b}_{h,\lambda(b)} \leftarrow \mathbb{E}[f_B(X, H) \mid (X, H) \in \mathcal{S}_{h,\lambda(b)}]$ 
10:     $r_{h,\lambda(b)} \leftarrow P(Y = 1 \mid (X, H) \in \mathcal{S}_{h,\lambda(b)})$ 
11:    if  $|r_{h,\lambda(b)} - \bar{b}_{h,\lambda(b)}| > \alpha$  then
12:      updated  $\leftarrow$  true
13:      for  $(x, h) \in \mathcal{S}_{h,\lambda(b)}$  do
14:         $f_B(x, h) \leftarrow f_B(x, h) + (r_{h,\lambda(b)} - \bar{b}_{h,\lambda(b)})$  {project into  $[0, 1]$  if necessary}
15:  until updated = false
16: for  $b \in \Lambda[0, 1]$  do
17:    $\bar{b}_{\lambda(b)} \leftarrow \mathbb{E}[f_B(X, H) \mid f_B(X, H) \in \lambda(b)]$ 
18:   for  $(x, h) \in \mathcal{Z} : f_B(x, h) \in \lambda(b)$  do
19:      $f_{B,\lambda}(x, h) \leftarrow \bar{b}_{\lambda(b)}$ 
20: return  $f_{B,\lambda}$ 

```

---

## 812 C Additional Details about the Experiments

813 **Transformation of confidence values.** The confidence values in the Human-AI Interactions dataset  
814 were originally recorded on a scale of  $[-1, 1]$ , where 1 means complete certainty on the correct  
815 true label and  $-1$  means complete certainty on the incorrect label. To better match our theoretical  
816 framework, we transform all confidence values to a scale of  $[0, 1]$ , where 1 means complete certainty  
817 that the true label  $y = 1$  and 0 means complete certainty that the true label is  $y \neq 1$ . More formally,  
818 let  $\hat{b}, \hat{h}, \hat{h}_{+AI} \in [-1, 1]$  be the original confidence values in the dataset, then we obtain  $b \in [0, 1]$  via  
819 the following transformation:

$$b = \begin{cases} (\hat{b} + 1)/2 & \text{if } y = 1 \\ 1 - (\hat{b} + 1)/2 & \text{if } y = 0, \end{cases}$$

820 and analogously for  $h$  and  $h_{+AI}$ .

821 **Comparing decision policies  $\pi_B$ ,  $\pi_H$  and  $\pi_{H+AI}$ .** Figure 6 shows the ROC curves for the decision  
822 policies  $\pi_B$ ,  $\pi_H$  and  $\pi_{H+AI}$  in each of the four tasks in the Human-AI Interactions dataset.

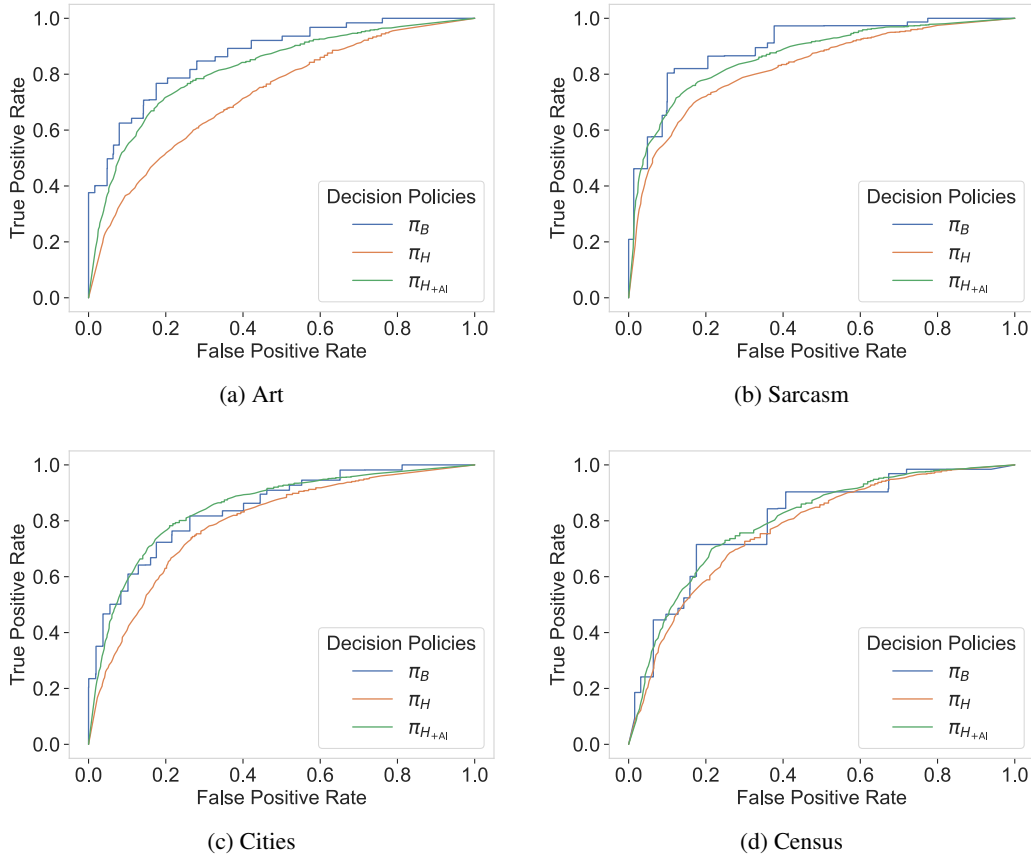

Figure 6: ROC curves for the decision policies  $\pi_B$ ,  $\pi_H$  and  $\pi_{H+AI}$ .
