# Supplementary material
Source: ML conference proceedings conference paper supplement (https://openreview.net/forum?id=GfITbjrIOd)

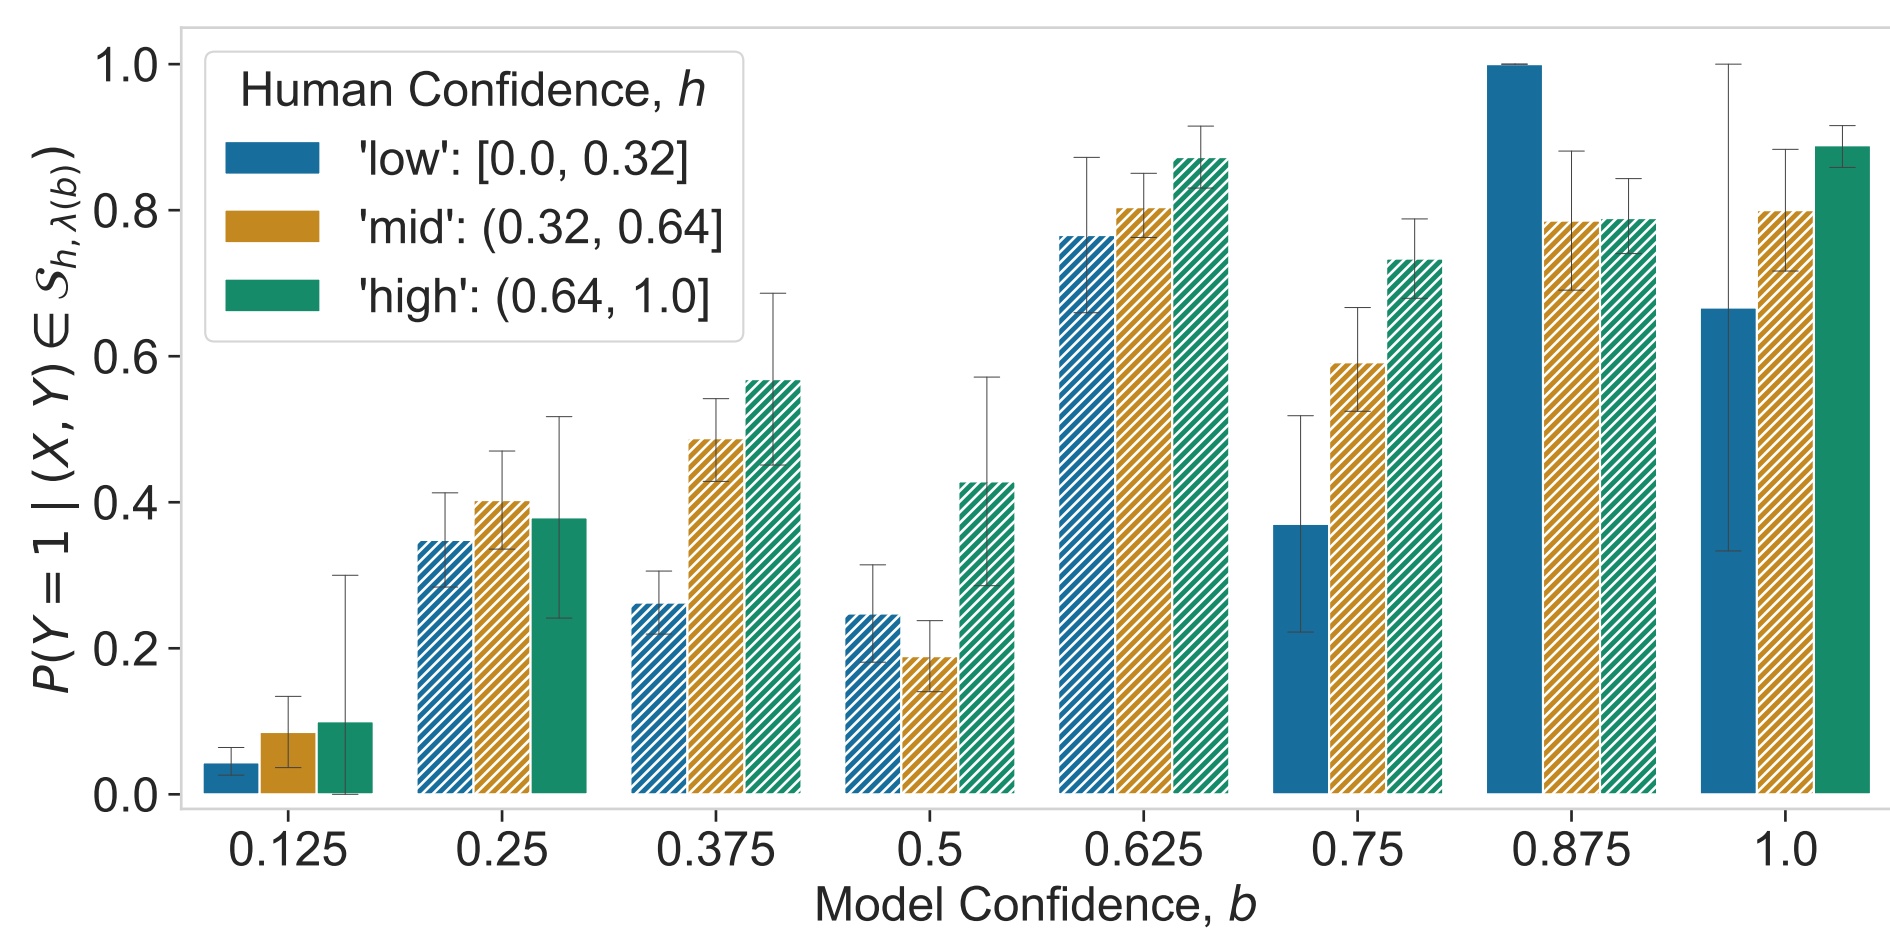

Supplement: supplementary_material [file attachment]

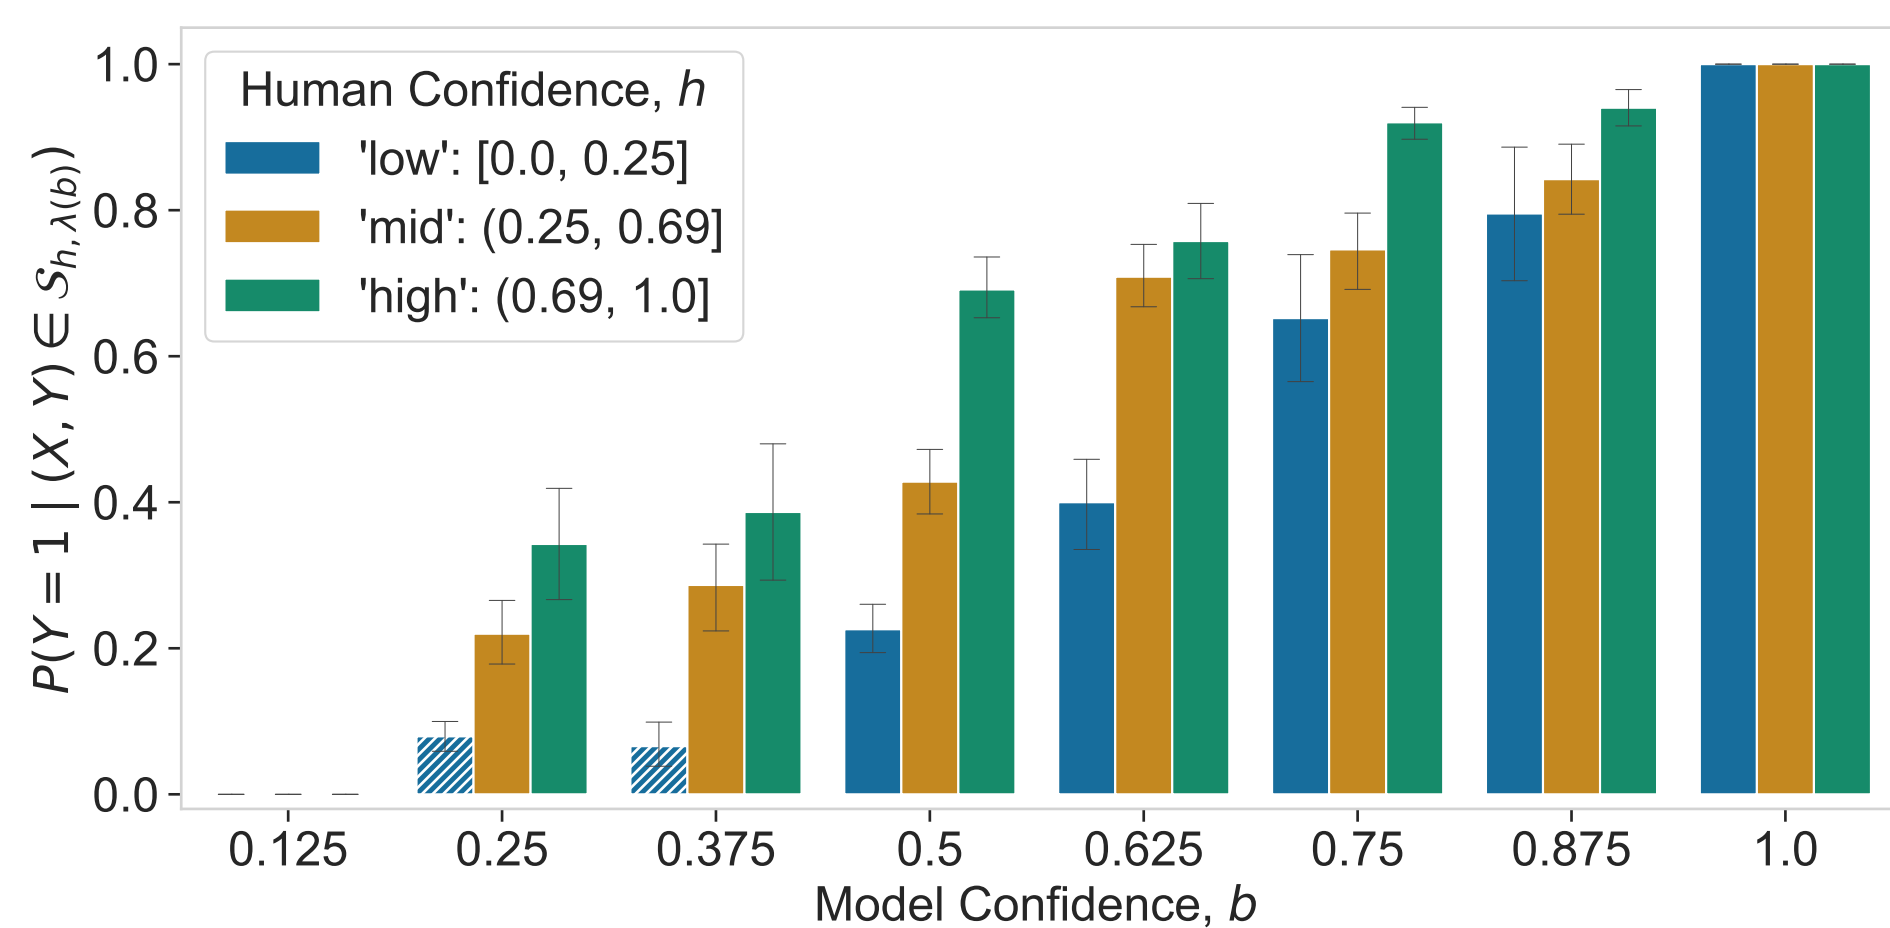

Supplement: supplementary_material [file attachment]

True Positive Rate

1.0  
0.8  
0.6  
0.4  
0.2  
0.0

0.0

0.2

0.4

0.6

0.8

1.0

False Positive Rate

Decision Policies

$\pi_B$

$\pi_H$

$\pi_{H+AI}$

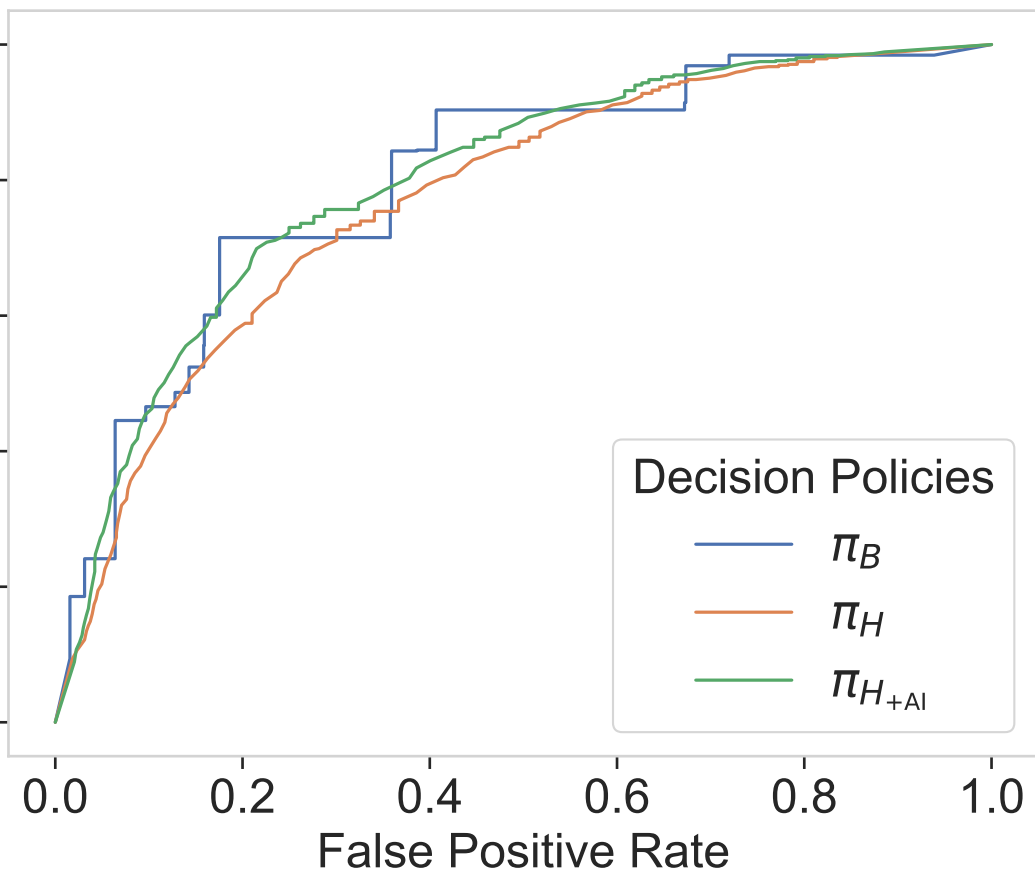

Supplement: supplementary_material [file attachment]

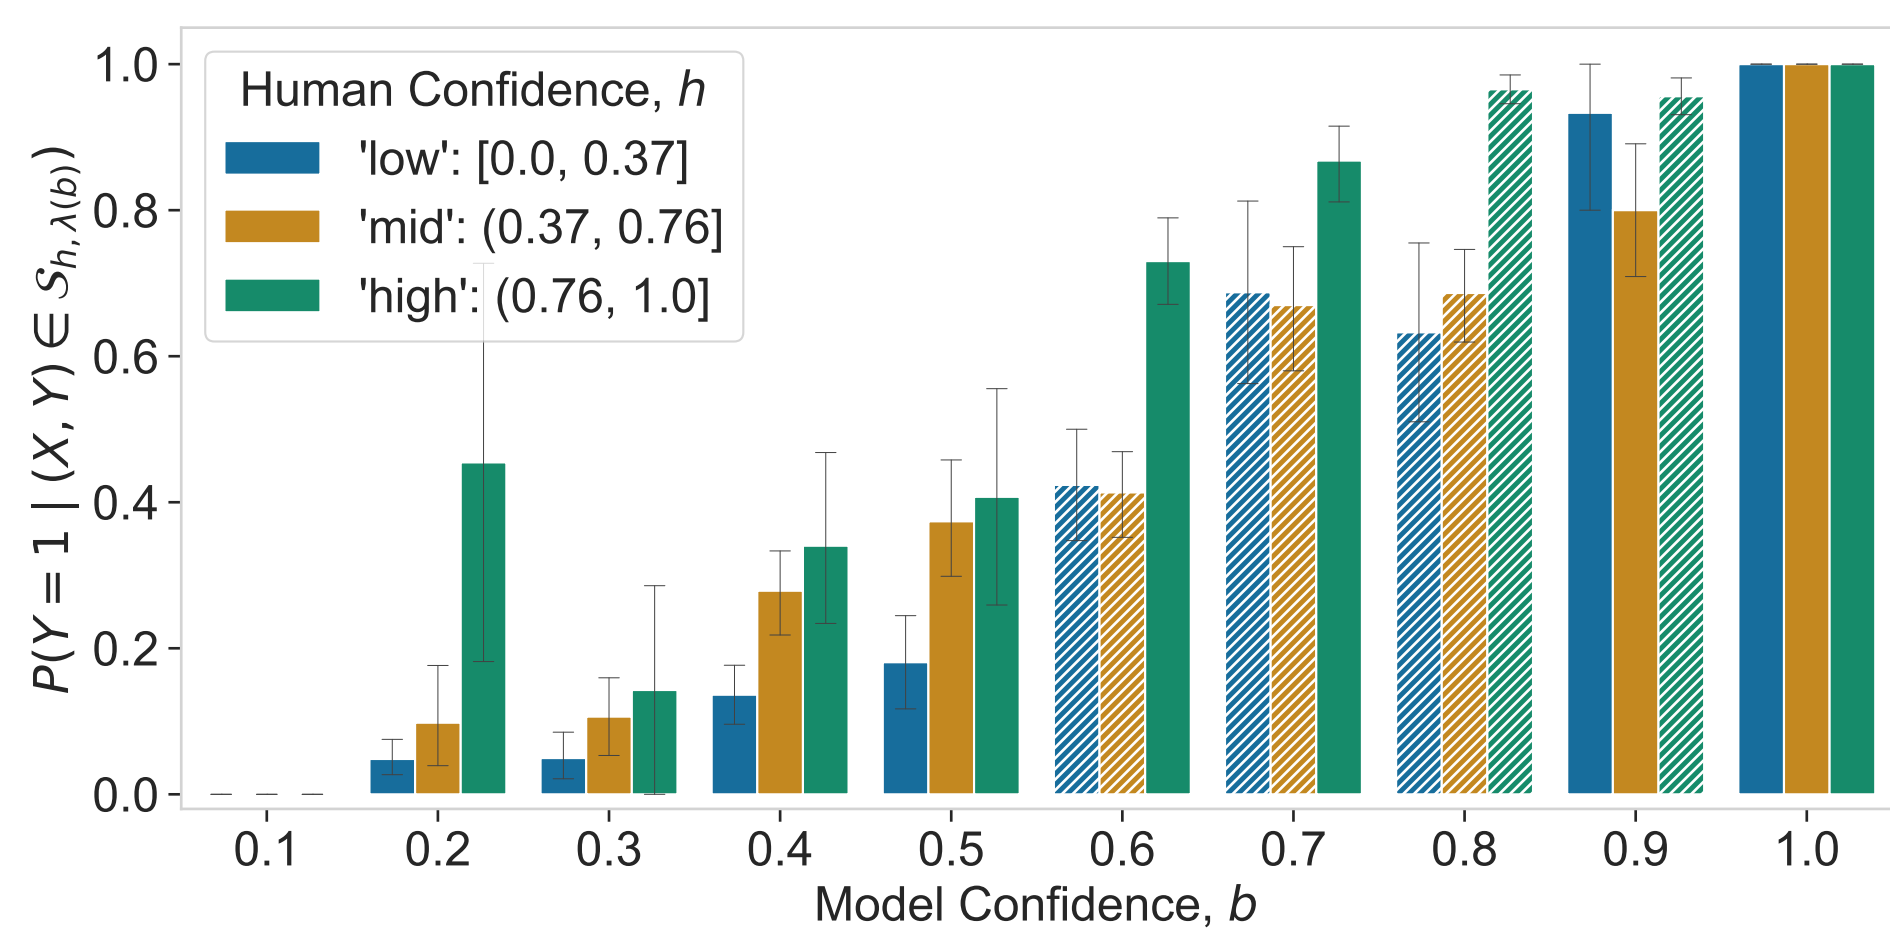

Supplement: supplementary_material [file attachment]

True Positive Rate

1.0  
0.8  
0.6  
0.4  
0.2  
0.0

0.0

0.2

0.4

0.6

0.8

1.0

False Positive Rate

Decision Policies

$\pi_B$

$\pi_H$

$\pi_{H+AI}$

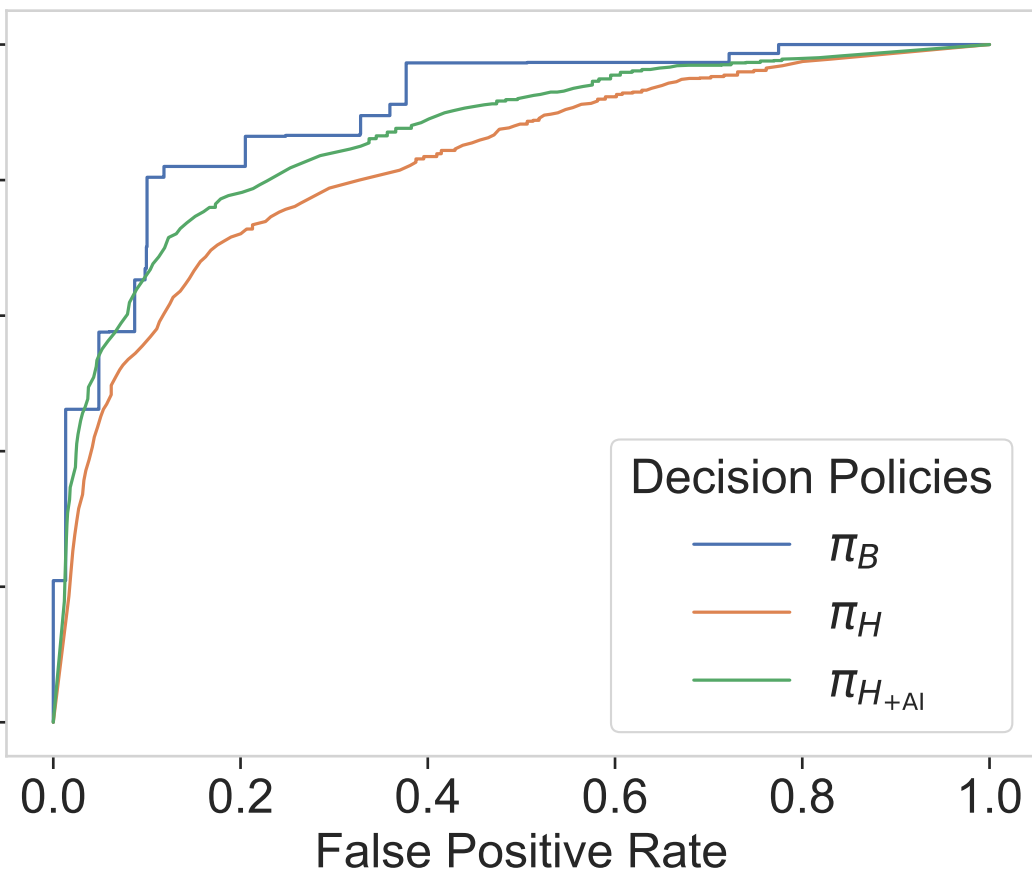

Supplement: supplementary_material [file attachment]

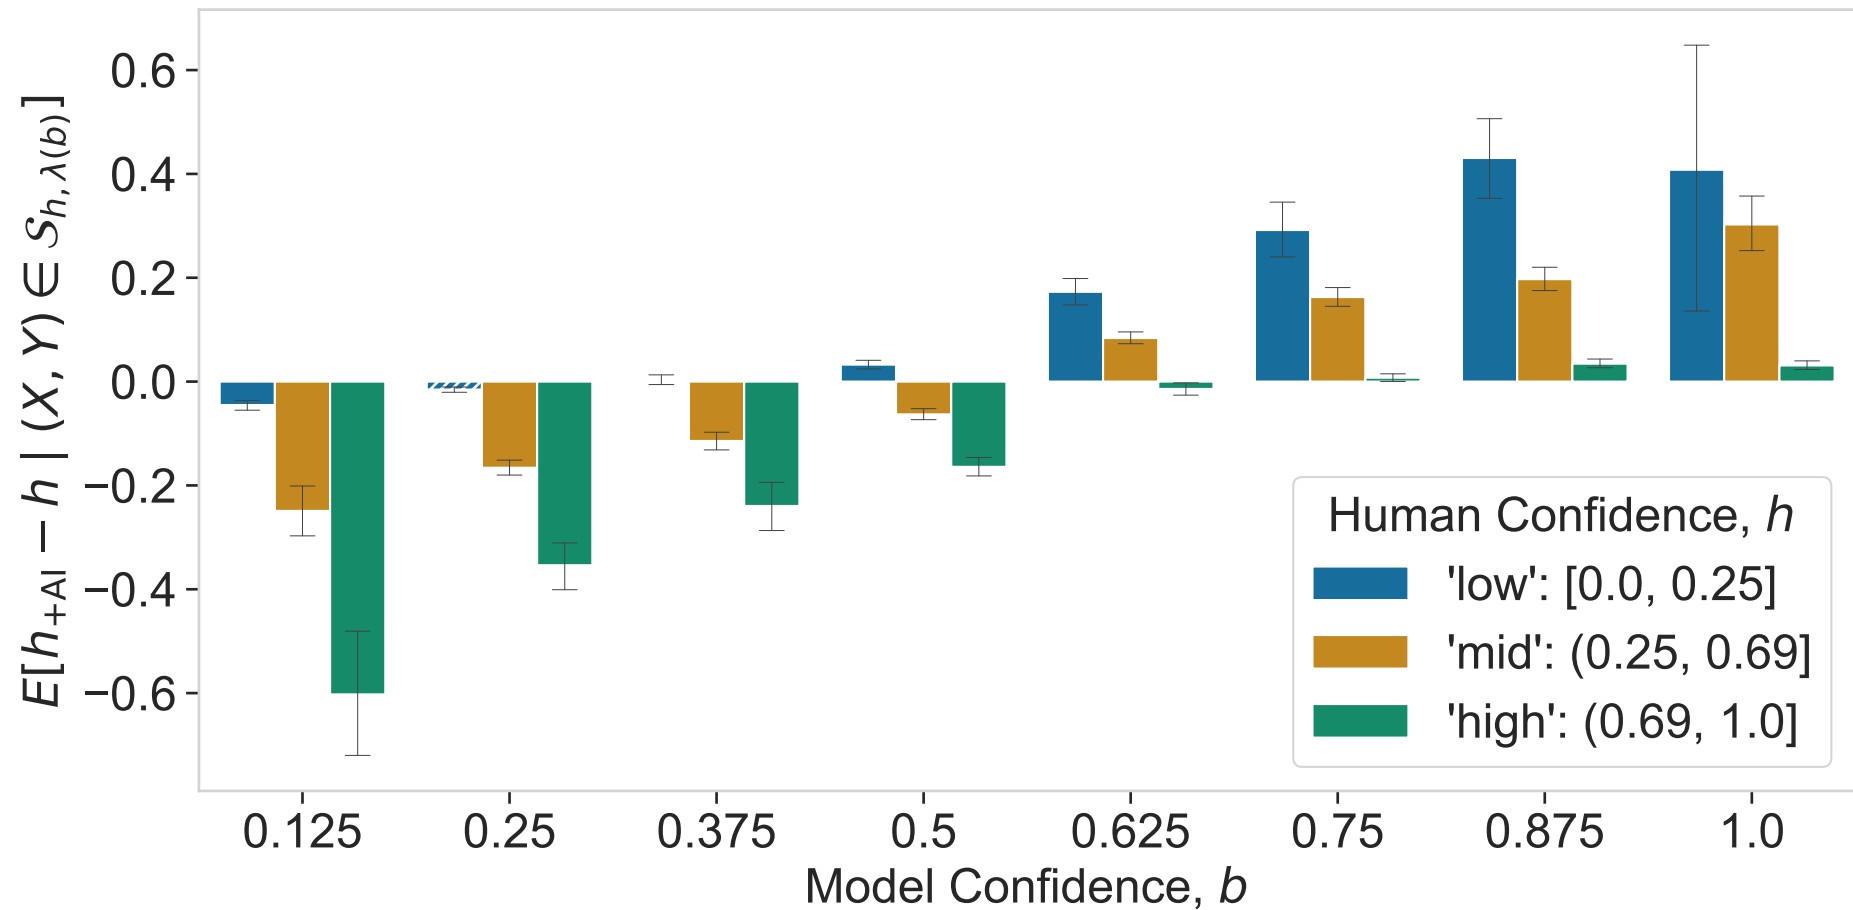

Supplement: supplementary_material [file attachment]

True Positive Rate

1.0  
0.8  
0.6  
0.4  
0.2  
0.0

0.0

0.2

0.4

0.6

0.8

1.0

False Positive Rate

Decision Policies

$\pi_B$

$\pi_H$

$\pi_{H+AI}$

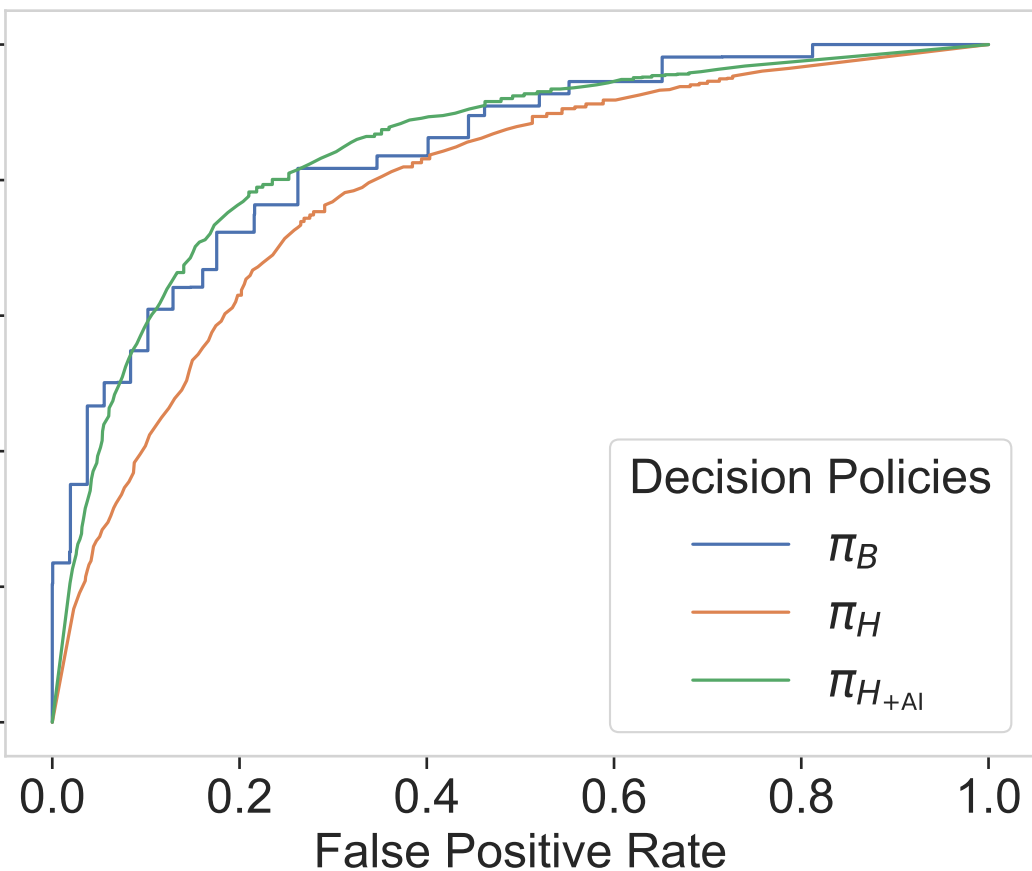

Supplement: supplementary_material [file attachment]

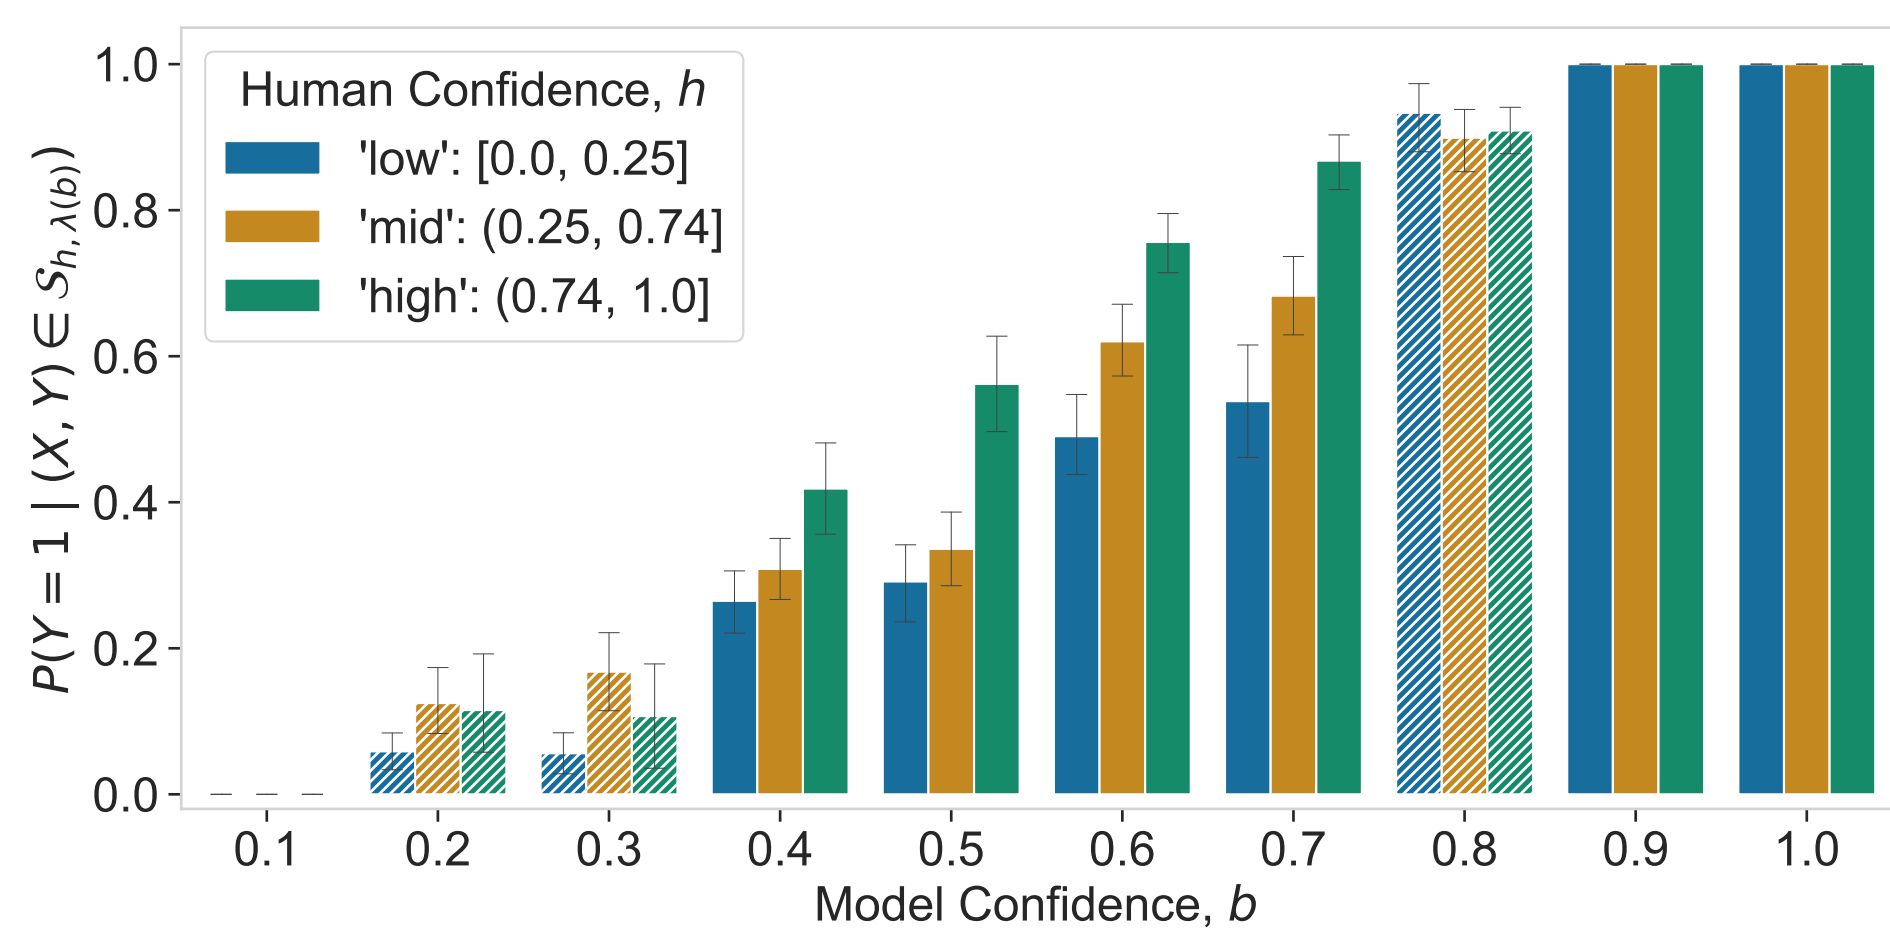

Supplement: supplementary_material [file attachment]

$$E[h_{+AI} - h \mid (X, Y) \in S_{h, \lambda(b)}]$$

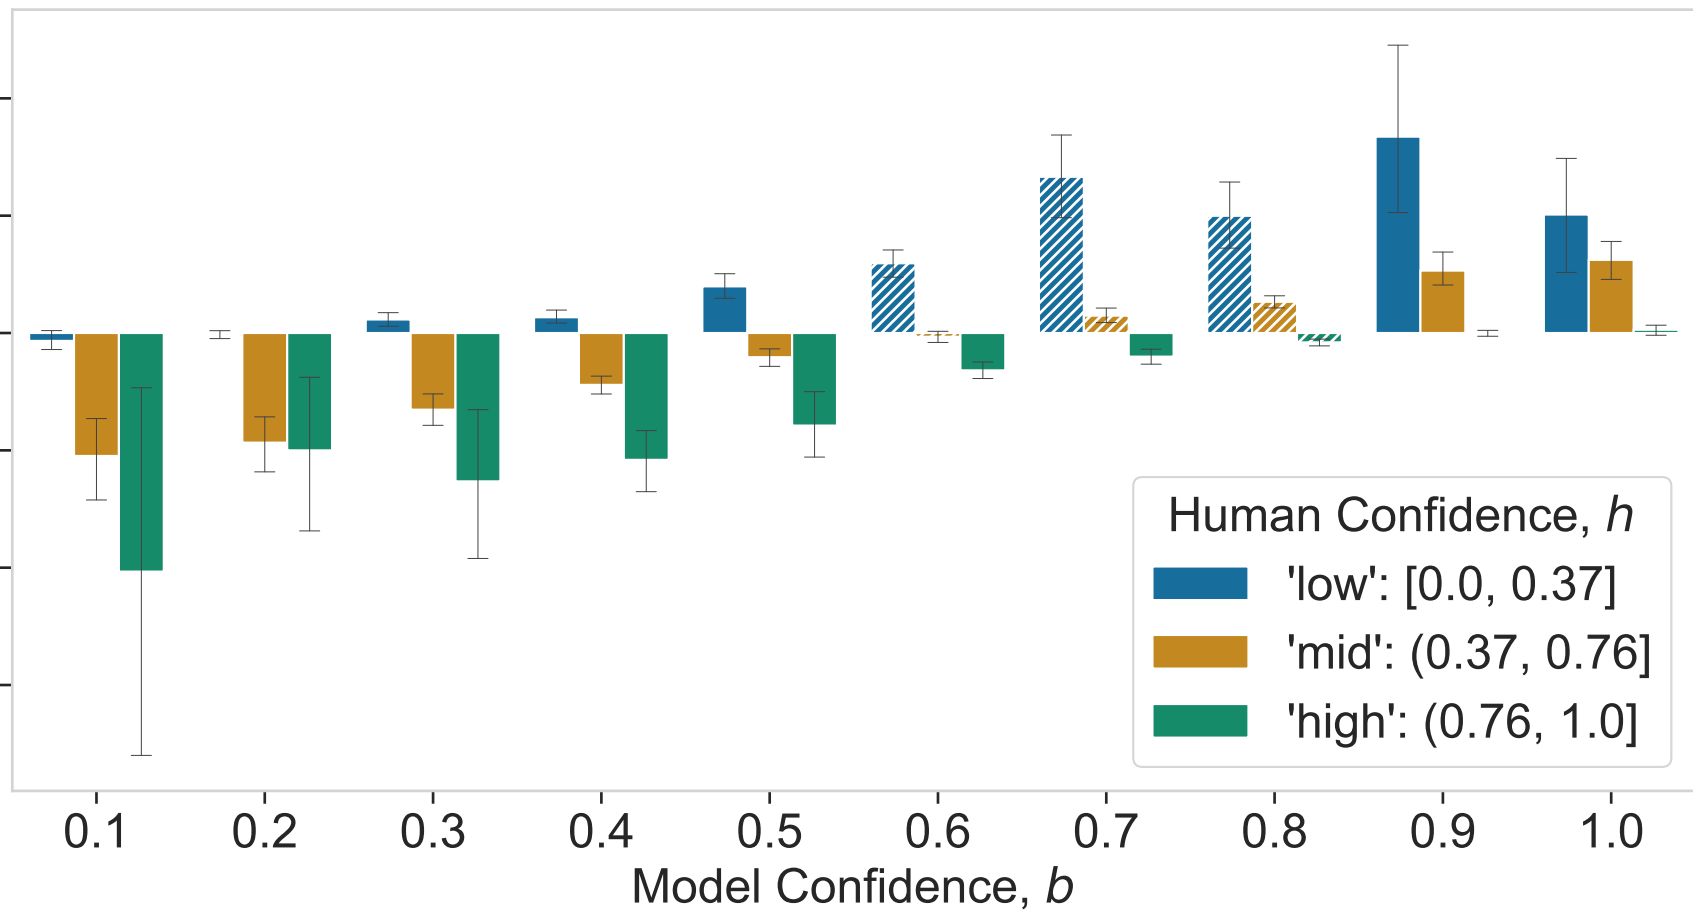

Supplement: supplementary_material [file attachment]

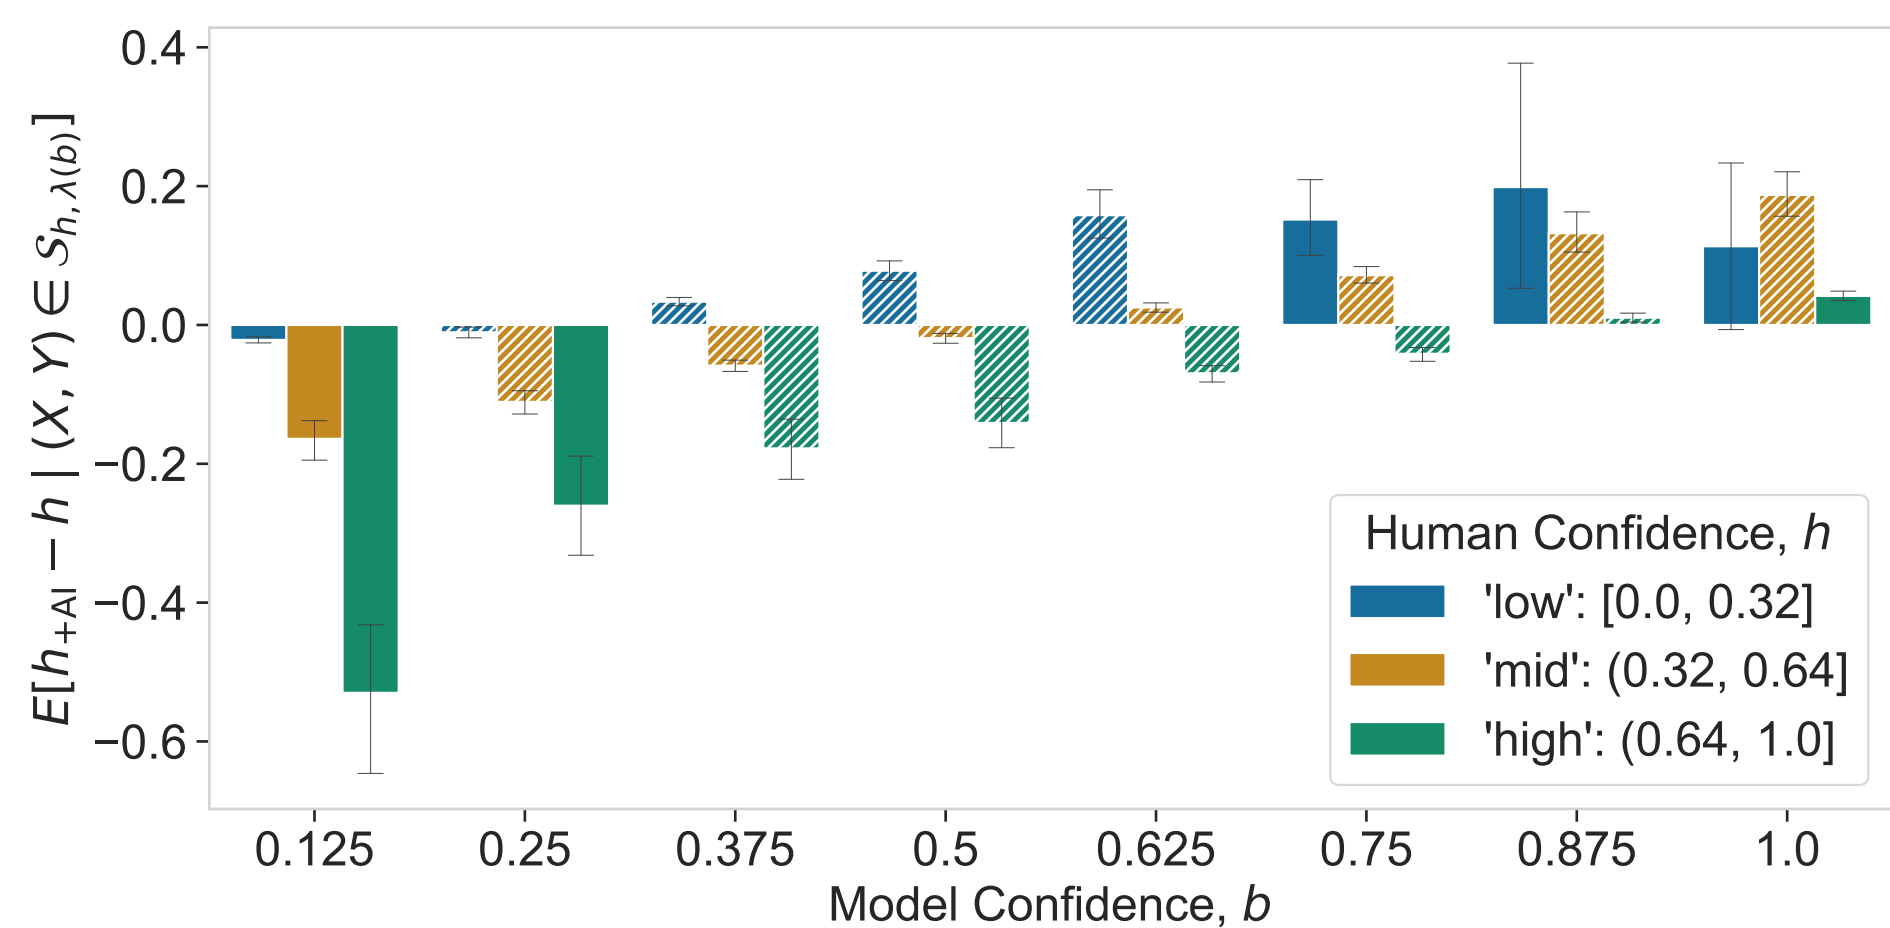

Supplement: supplementary_material [file attachment]

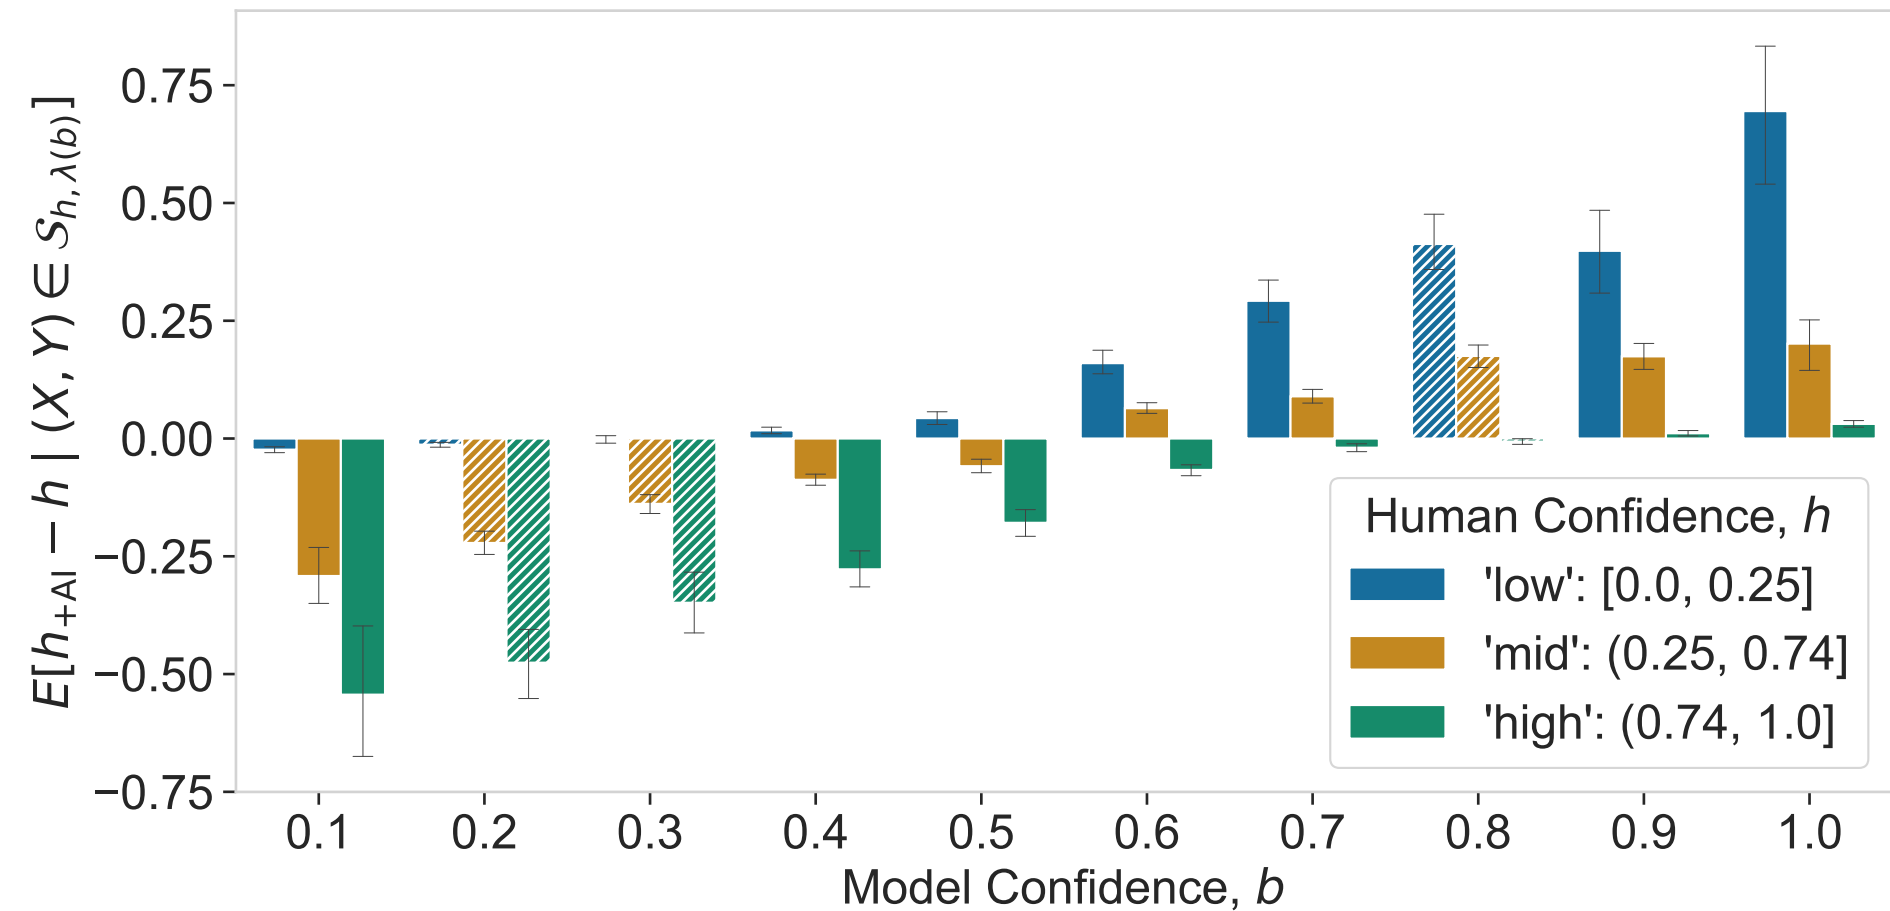

Supplement: supplementary_material [file attachment]

True Positive Rate

1.0  
0.8  
0.6  
0.4  
0.2  
0.0

0.0

0.2

0.4

0.6

0.8

1.0

False Positive Rate

Decision Policies

$\pi_B$

$\pi_H$

$\pi_{H+AI}$

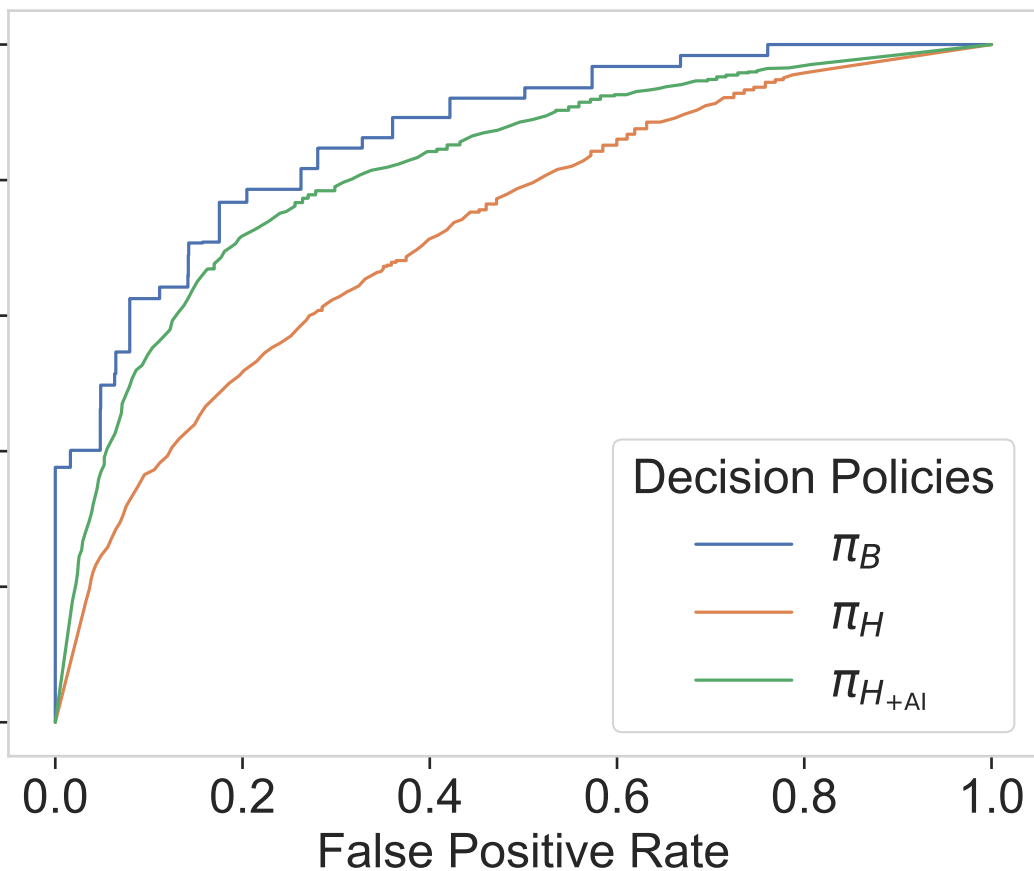

Supplement: supplementary_material [file attachment]
